# Supplementary material
Source: PubMed Central journal article supplement (PMC3673541)
Supplement: NIHMS329348-supplement-1_si_001.pdf [file NIHMS329348-supplement-1_si_001.pdf]

## Supporting Information

### **Thermodynamics of Nucleic Acid “Shape Readout” by an Aminosugar**

Hongjuan Xi, Erik Davis, Nihar Ranjan, Liang Xue, David Hyde-Volpe, and Dev P. Arya\*

*Laboratory of Medicinal Chemistry, Department of Chemistry, Clemson University, Clemson, South Carolina, 29634*

#### **Contents.**

- 1. Figure S1.** Sigmoidal curve fits for (a) neomycin, (b) paromomycin, (c) ribostamycin, and (d) neamine FID titrations into poly(rA)•poly(rU) duplex using 96 well plate-reader fluorescence. (page 8)
- 2. Figure S2.** Sigmoidal curve fits for (a) neomycin, (b) paromomycin, (c) ribostamycin, and (d) neamine FID titrations into poly(rA)•2poly(rU) duplex using 96 well plate-reader fluorescence. (page 9)
- 3. Figure S3.** Sigmoidal curve fits for (a) neomycin, (b) paromomycin, (c) ribostamycin, and (d) neamine FID titrations into poly(dA)•poly(rU) duplex using (a-c) 96 well plate-reader fluorescence and (d) fluorescence. (page 10)
- 4. Figure S4.** Sigmoidal curve fits for (a) neomycin, (b) paromomycin, (c) ribostamycin, and (d) neamine FID titrations into poly(rA)•poly(dT) duplex using (a) 96 well plate-reader fluorescence and (b-d) fluorescence. (page 11)
- 5. Figure S5.** Sigmoidal curve fits for (a) neomycin, (b) paromomycin, (c) ribostamycin, and (d) neamine FID titrations into poly(dT-dT)<sub>2</sub> duplex (a-b, d) using 96 well plate-reader fluorescence assays and (c) fluorescence. (page 12)

6. **Figure S6.** Sigmoidal curve fits for (a) neomycin, (b) paromomycin, (c) ribostamycin, and (d) neamine FID titrations into poly(dA)•2poly(dT) triplex fluorescence titrations. (page 13)
7. **Figure S7.** Sigmoidal curve fits for neomycin FID titrations into (a) dA<sub>30</sub>•2dT<sub>30</sub>, (b) dA<sub>30</sub>•rU<sub>30</sub>, (c) rA<sub>30</sub>•dT<sub>30</sub>, (d) rA<sub>30</sub>•rU<sub>30</sub>, (e) rA<sub>30</sub>•2rU<sub>30</sub>, (f) dA<sub>30</sub>•dT<sub>30</sub> oligomers using fluorescence titrations. (page 14)
8. **Figure S8.** Sigmoidal curve fit for neomycin FID titration into dA<sub>30</sub>•2dT<sub>30</sub> using fluorescence titration. (page 15)
9. **Figure S9.** CD melting profiles of poly(rU) in the absence (a) and presence (b) of neomycin. (c) CD scan of poly(rU). (d) UV melting profile of poly(U). (page 16)
10. **Figure S10.** (a,b) DSC melting profiles of poly(dA)•poly(dT). (c) CD scans of neomycin titration with poly(dA)•poly(dT) duplex. (d) A plot of CD signals at 247 nm vs. corresponding  $r_{bd}$  values. (e,f) ITC titration of neomycin into poly(dA)•poly(dT). (page 17)
11. **Figure S11.** (a,b) DSC melting profiles of poly(dA-dT)<sub>2</sub>. (c) CD scans of neomycin titration with poly(dA-dT)<sub>2</sub> duplex. (d) A plot of CD signals at 247 nm vs. corresponding  $r_{bd}$  values. (page 18)
12. **Figure S12.** (a) DSC melting profiles of poly(dA-dT)<sub>2</sub>. (b) CD scans of neomycin titration with poly(dA-dT)<sub>2</sub>. (c) A plot of CD signals at 246 nm vs. corresponding  $r_{bd}$  values. (d,e) ITC titration of neomycin into poly(dA-dT)<sub>2</sub>. (page 19)
13. **Figure S13.** (a) A plot of d(A<sub>2</sub>G<sub>15</sub>C<sub>15</sub>T<sub>2</sub>)<sub>2</sub> CD signals at 212nm vs. corresponding  $r_{bd}$  values. (b,c) ITC titrations of neomycin into DNA at (b) 20 °C and (c) 30 °C. (page 21)

- 14. Figure S14.** (a) CD scans of neomycin titration with DNA duplex  $d(A_2G_{15}C_{15}T_2)_2$ . (b) A plot of CD signals at 270 nm *versus* corresponding  $r_{bd}$  values. (c) ITC titration of neomycin with  $d(A_2G_{15}C_{15}T_2)_2$ . The binding site size for first binding event was shown in plot. (page 22)
- 15. Figure S15.** ITC titration of neomycin into  $d(A_2G_{15}C_{15}T_2)_2$  at (a) 10 °C, (b) 20 °C, and (c) 30 °C. (page 23)
- 16. Figure S16.** DSC melting profiles of  $poly(dG-dC)_2$  in the absence (a) and presence (b) of neomycin. (page 24)
- 17. Figure S17.** (a,b) ITC titration of neomycin into  $poly(dG-dC)_2$ . (page 25)
- 18. Figure S18.** (a) DSC melting profiles of calf thymus in the absence of neomycin. (b) UV melting profiles of duplex in the absence (1) and presence (2) of neomycin at  $r_{bd}$  of 6. (c) CD scans of neomycin titration with calf thymus duplex. (d) A plot of CD signals at 247 nm vs. corresponding  $r_{bd}$  values. (e,f) ITC titration of neomycin into DNA at 10 °C (e) and 20 °C (f). (page 26)
- 19. Figure S19.** (a) UV melting profiles of  $poly(rA) \bullet poly(dT)$  duplex in the absence (1) and presence (2) of neomycin at  $r_{bd}$  8. (b,c) ITC titration of neomycin into DNA at (b) 35 °C and (c) 45 °C. (page 27)
- 20. Figure S20.** (a) UV melting profiles of  $poly(dA) \bullet poly(rU)$  duplex in the absence (1) and presence (2) of neomycin at  $r_{bd}$  6.5. (b) CD scans of neomycin titration with  $poly(dA) \bullet poly(rU)$ . (c) A plot of CD signals at 243 nm versus corresponding  $r_{bd}$  values. ITC titration of neomycin into target at (d) 10 °C and (e) 20 °C. (page 28)

- 21. Figure S21.** (a,b) DSC melting profiles of poly(dA)•poly(rU) in the absence (a) and presence (b) of neomycin. (c) CD scans of neomycin titration with hybrid duplex. (d) A plot of CD signals at 261 nm vs. corresponding  $r_{bd}$  values. (page 29)
- 22. Figure S22.** ITC titration of neomycin into poly(dA)•poly(rU) at (a) 10 °C (b) 20 °C and (c). 30 °C (d) A plot of observed binding enthalpy vs. temperature. Slope reveals the heat capacity changes. (page 30)
- 23. Figure S23.** (a) DSC melting profiles of poly(rA)•poly(dT) in the presence of neomycin at  $r_{bd}$  8. (b) CD scans of neomycin titration with hybrid duplex. CD scans of neomycin titration with poly(rA)•poly(dT). (c) A plot of CD signals at 260 nm vs. corresponding  $r_{bd}$  values. (page 31)
- 24. Figure S24.** ITC titration of neomycin into poly(rA)•poly(dT) at (a) 10 °C (b) 20 °C and (c) 30 °C. (d) A plot of observed binding enthalpy *versus* temperature. (page 32)
- 25. Figure S25.** (a) DSC melting profiles of 16S A site rRNA in the absence of neomycin. (b,c) ITC titration of neomycin into RNA at (b) 20 °C and (c) 10 °C. (page 33)
- 26. Figure S26.** (a) DSC melting profiles of 16S A site rRNA in the absence of neomycin. (b) Thermal stability of A-site rRNA induced by neomycin at  $r_{dd}$  1 and 2. (c) CD scans of neomycin titration with rRNA. (d) A plot of CD signals at 210 nm *versus* corresponding  $r_{bd}$  values. (page 34)
- 27. Figure S27.** ITC titration of neomycin into 16S A site rRNA at (a) 10 °C (b) 20 °C and (c) 30 °C. (d) A plot of ITC derived  $\Delta H$  *versus* temperatures. (page 35)

- 28. Figure S28.** (a) DSC melting profiles of poly(rA)•poly(rU) in the absence of neomycin. (b) CD scans of neomycin titration with poly(rA)•poly(rU)  $r_{bd}$  8. (c,d) ITC titration of neomycin into DNA at (c) 15 °C and (d) 20 °C. (page 36)
- 29. Figure S29.** ITC excess site titration heat bursts for neomycin into poly(rA)•poly(rU). (page 37)
- 30. Figure S30.** (a,b) DSC melting profiles of poly(rA)•poly(rU) in (a) the absence and (b) presence of neomycin. (c) A plot of ITC derived  $\Delta H$  *versus* temperatures. (page 38)
- 31. Figure S31.** (a) CD scans of neomycin titration with poly(dA)•2poly(dT). (b) A plot of CD signals at 246 nm *versus* corresponding  $r_{bd}$  values. (c,d) ITC titration of neomycin into DNA at (c) 15 °C and (d) 5 °C . (page 39)
- 32. Figure S32.** ITC titration of neomycin into poly(dA)•2poly(dT) at (a) 10 °C, (b) 15 °C, and (c) 18 °C. (d) A plot of ITC derived  $\Delta H$  *versus* temperatures. (page 40)
- 33. Figure S33.** (a) DSC melting profiles of poly(dA)•2poly(dT) in the absence of neomycin. (b) CD scans of neomycin titration with DNA. (c) A plot of CD signals at 247 nm *vs.* corresponding  $r_{bd}$  values. (page 41)
- 34. Figure S34.** (a) CD scans of neomycin titration with poly(rA)•2poly(rU). (b) A plot of CD signals at 260 nm *versus* corresponding  $r_{bd}$  values. (c) DSC melting profile of poly(rA)•2poly(rU) in the absence of neomycin at  $r_{bd}$  8.5. (d) A plot of ITC derived  $\Delta H_{obs}$  *versus* temperatures. (page 42)
- 35. Figure S35.** (a,b) ITC titration of neomycin into poly(rA)•2poly(rU) at (a) 15 °C and (b) 25 °C. (page 43)

- 36. Figure S36.** UV thermal denaturation profiles of *Oxytricha* telomeric quadruplex (a) in the absence of neomycin at pH 5.5 (b) in the presence of neomycin at pH 5.5 (c) in the absence of neomycin at pH 6.8 (d) in the presence of neomycin at pH 6.8. (page 44)
- 37. Figure S37.** ITC titration of neomycin into (a,b) *Oxytricha nova* telomeric DNA and (c,d) human telomeric DNA. (Page 45)
- 38. Figure S38.** UV thermal denaturation profiles of human telomeric quadruplex (a) in the absence of neomycin at pH 5.5 (b) in the presence of neomycin at pH 5.5 (c) in the absence of neomycin at pH 6.8 (d) in the presence of neomycin at pH 6.8. (page 46)
- 39. Figure S39.** (a) DSC melting profiles of i-motif DNA in the absence of neomycin. (c) A plot of CD signals at 266 nm *versus* corresponding  $r_{bd}$  values. The cross of two apparent linear portions reveals binding site sites. (c,d) ITC titration of neomycin into DNA at (c) 10 °C and (d) 20 °C. (page 47)
- 40. Figure S40.** (a) Fluorescence titration of neomycin into poly(rA).poly(dT). (b) A plot of fluorescence intensity *versus* corresponding  $r_{bd}$  values. The cross of two apparent linear portions reveals  $r_{bd} \sim 7$ . (page 48)
- 41. Figure S41.** (a) Fluorescence titration of neomycin into poly(dA-dT)<sub>2</sub>. (b) A plot of fluorescence intensity *versus* corresponding  $r_{bd}$  values. The cross of two apparent linear portions reveals  $r_{bd} \sim 8.5$ . (page 48)
- 42. Figure S42.** (a) Fluorescence titration of neomycin into poly(rA).poly(rU). (b) A plot of fluorescence intensity *versus* corresponding  $r_{bd}$  values. The cross of two apparent linear portions reveals  $r_{bd} \sim 8.5$ . (page 49)

- 43. Table 1.** Computer generated models for neomycin bound to various nucleic acids as suggested by docking studies using Autodock Vina 1.0. (page 50)
- 44. Table 2.** Computer generated data for neomycin bound to various nucleic acids as a as determined according to structure. Results report binding affinity as a function of groove width. (page 51)
- 45. Table 3.** A-form nucleic acid structures bound to neomycin and modeled according to content and length. Results report binding affinity as a function of groove width. (page 52)
- 46. Figure S43.** <sup>1</sup>H NMR of fluorescein-neomycin (**F-neo**) conjugate **4**. (page 53)
- 47. Figure S44.** MALDI-TOF spectra of fluorescein-neomycin (**F-neo**) conjugate **4**. (page 54)

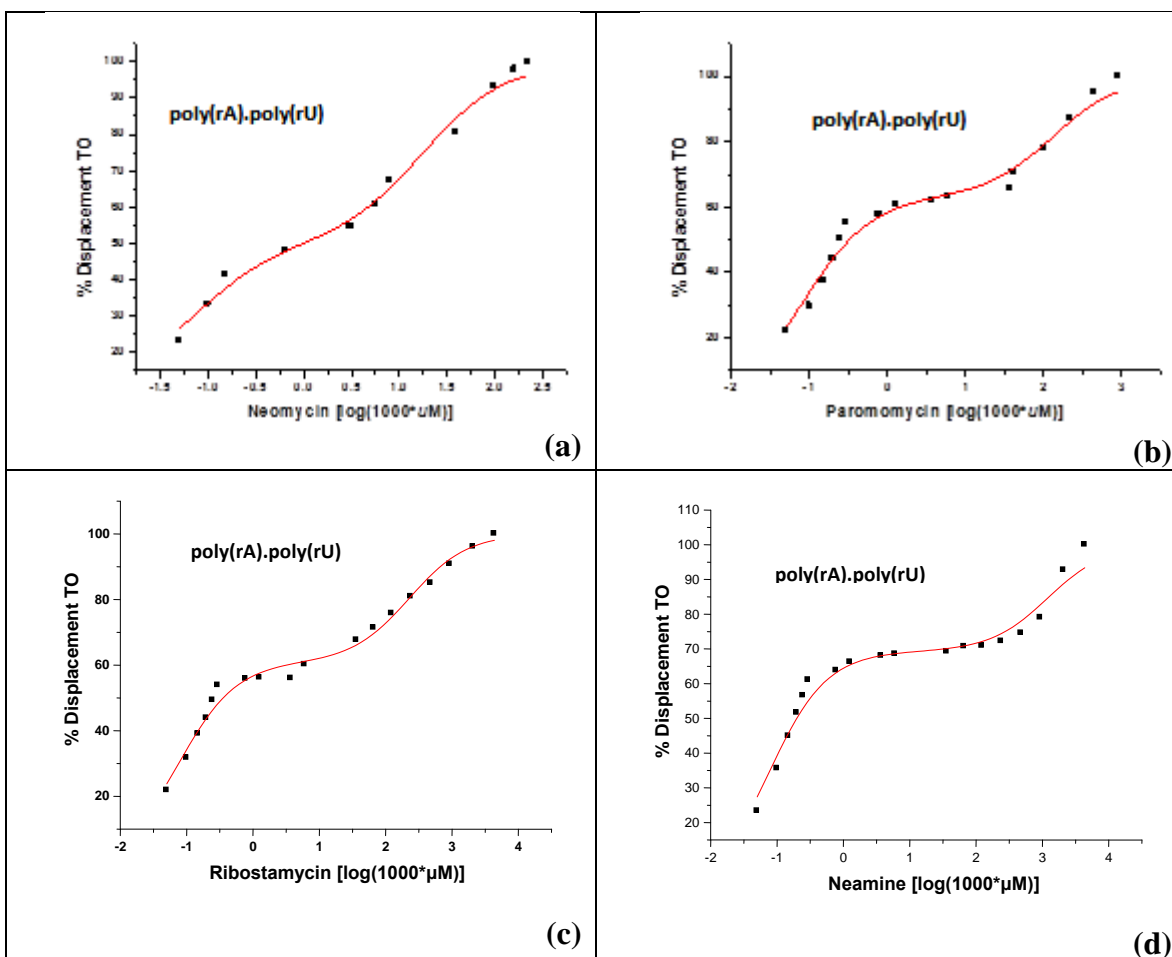

**Figure S1.** Sigmoidal curve fits for (a) neomycin, (b) paromomycin, (c) ribostamycin, and (d) neamine FID titrations into poly(rA)•poly(rU) duplex using 96 well plate-reader fluorescence. All experiments were carried out in buffer 10 mM sodium cacodylate, 0.5 mM EDTA, 100 mM NaCl at pH 6.8



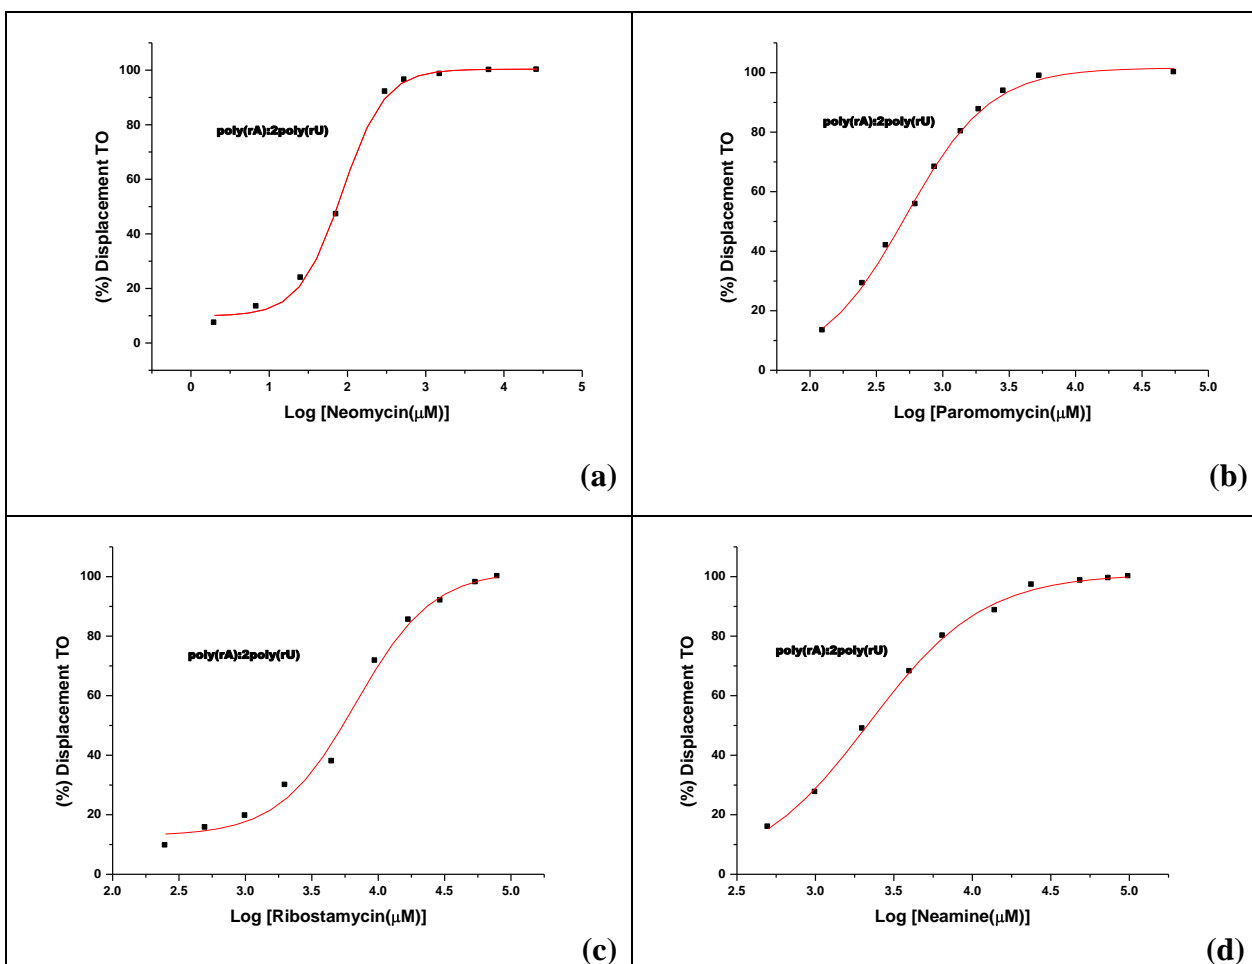

**Figure S2.** Sigmoidal curve fits for (a) neomycin, (b) paromomycin, (c) ribostamycin, and (d) neamine FID titrations into poly(rA)•2poly(rU) duplex using 96 well plate-reader fluorescence. All experiments were carried out in buffer 10 mM sodium cacodylate, 0.5 mM EDTA, 100 mM NaCl at pH 6.8.

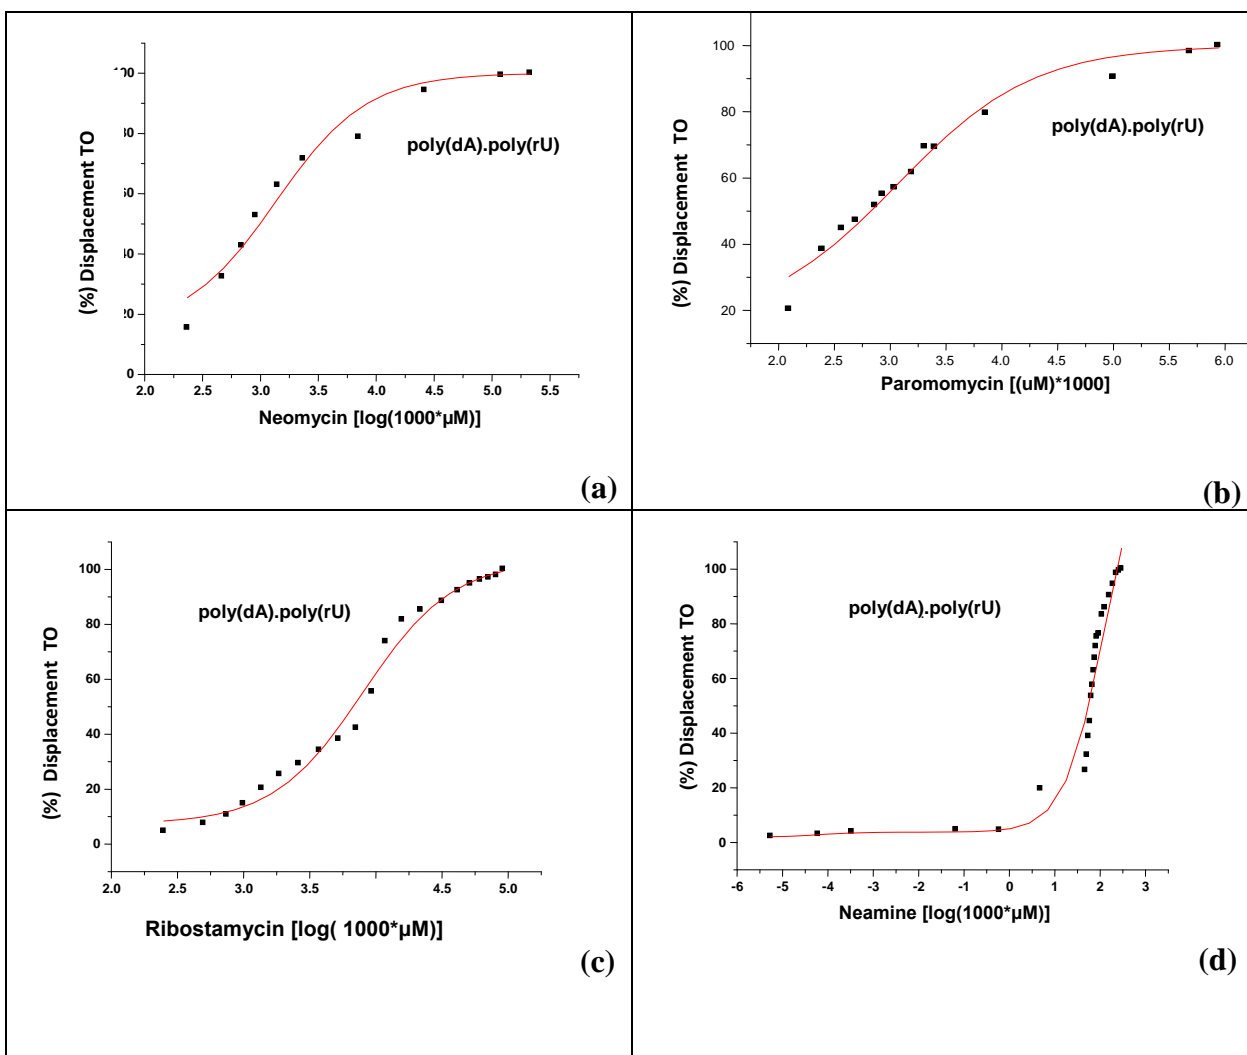

**Figure S3.** Sigmoidal curve fits for (a) neomycin, (b) paromomycin, (c) ribostamycin, and (d) neamine FID titrations into poly(dA)•poly(rU) duplex using (a-c) 96 well plate-reader fluorescence and (d) fluorescence. All experiments were carried out in buffer 10 mM sodium cacodylate, 0.5 mM EDTA, 100 mM NaCl at pH 6.8.

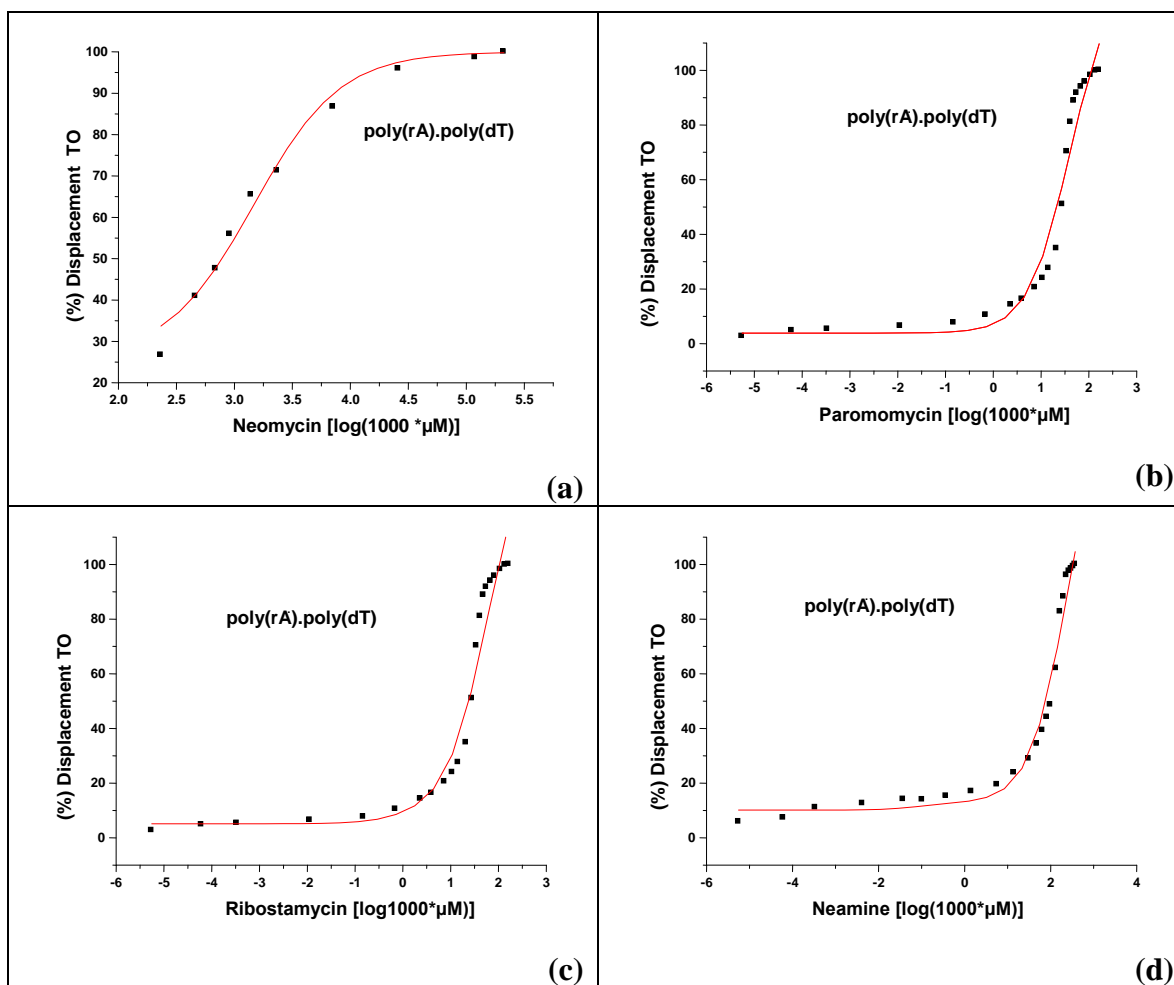

**Figure S4.** Sigmoidal curve fits for (a) neomycin, (b) paromomycin, (c) ribostamycin, and (d) neamine FID titrations into poly(rA)•poly(dT) duplex using (a) 96 well plate-reader fluorescence and (b-d) fluorescence. All experiments were carried out in buffer 10 mM sodium cacodylate, 0.5 mM EDTA, 100 mM NaCl at pH 6.8.

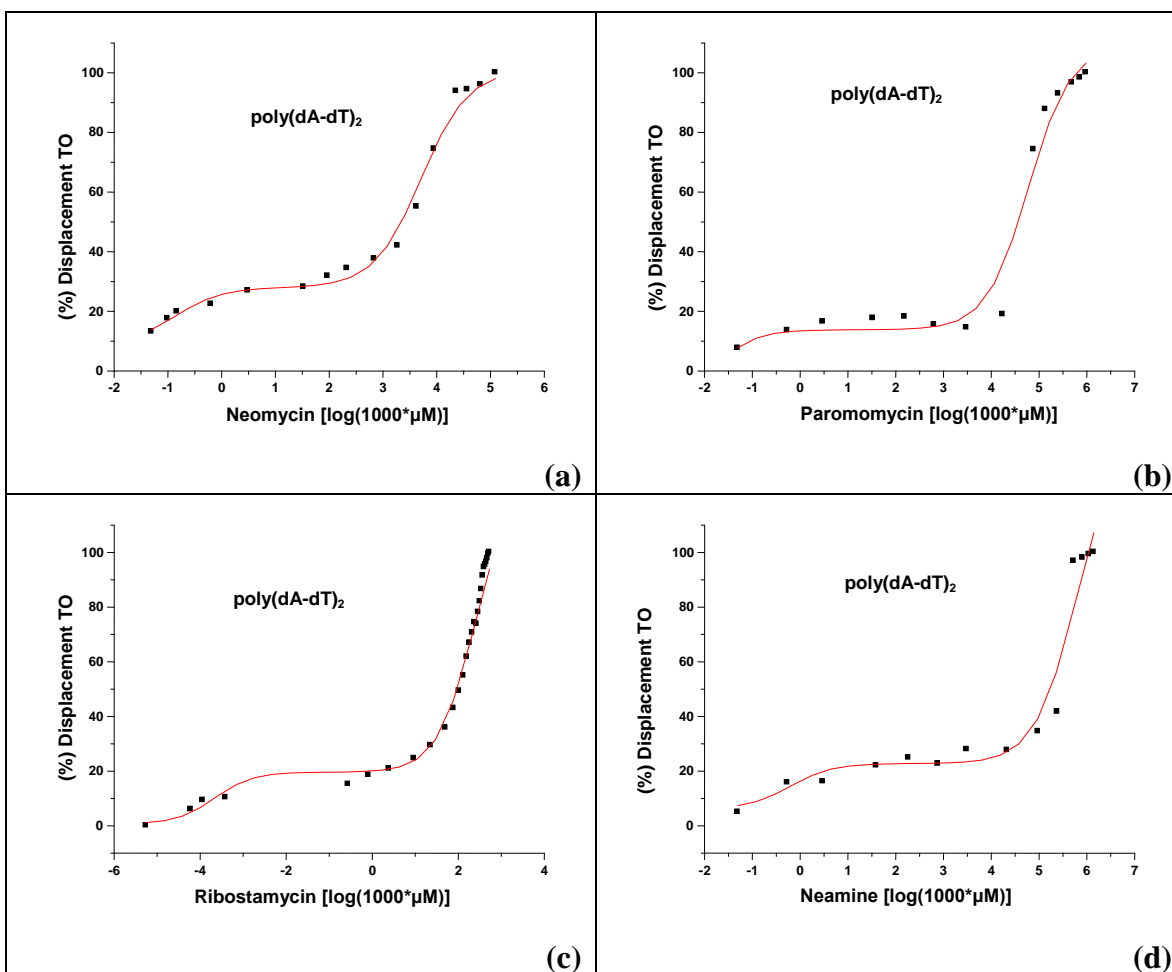

**Figure S5.** Sigmoidal curve fits for (a) neomycin, (b) paromomycin, (c) ribostamycin, and (d) neamine FID titrations into poly(dT-dT)<sub>2</sub> duplex using (a-b, d) 96 well plate-reader fluorescence assays and (c) fluorescence. All experiments were carried out in buffer 10 mM sodium cacodylate, 0.5 mM EDTA, 100 mM NaCl at pH 6.8.

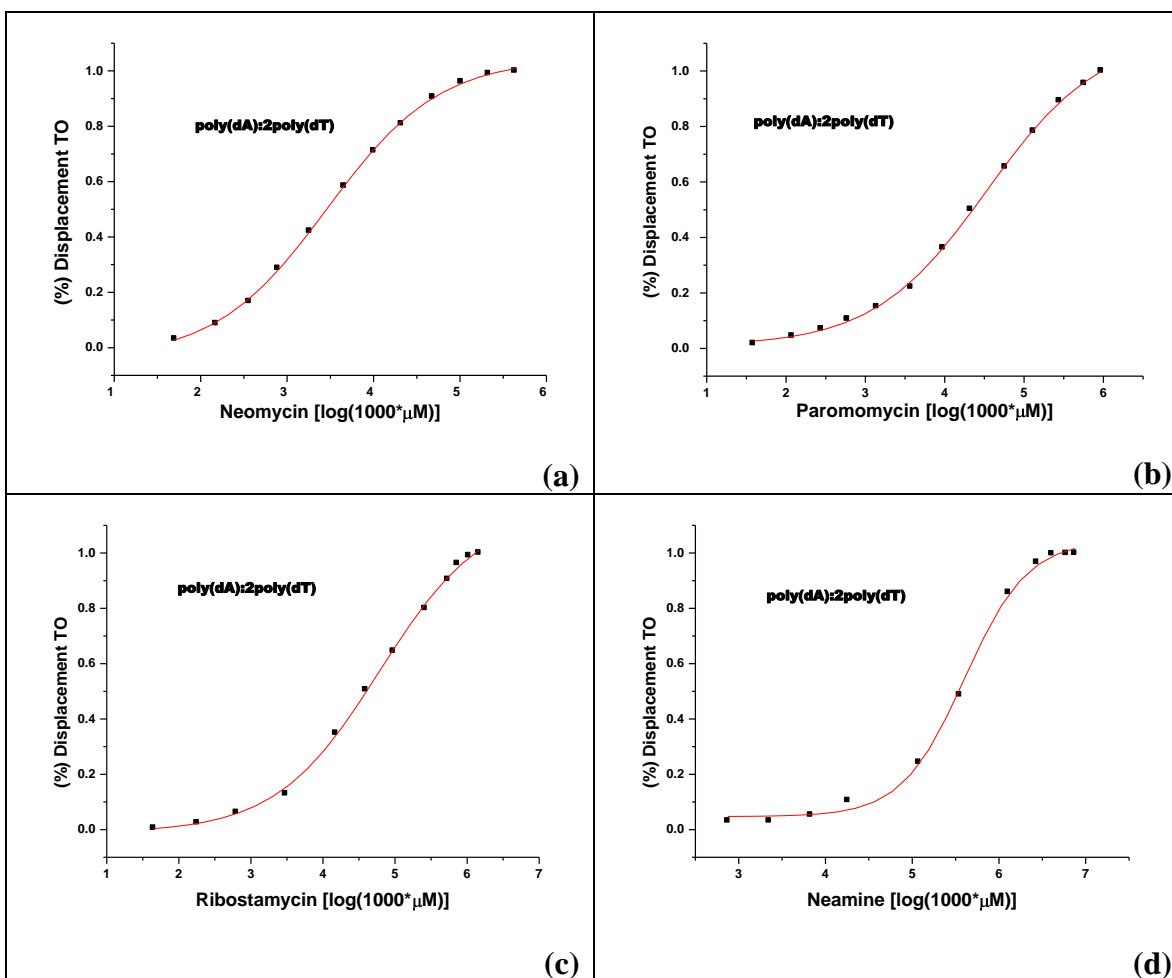

**Figure S6.** Sigmoidal curve fits for (a) neomycin, (b) paromomycin, (c) ribostamycin, and (d) neamine FID titrations into poly(dA)•2poly(dT) triplex fluorescence titrations. All experiments were carried out in buffer 10 mM sodium cacodylate, 0.5 mM EDTA, 100 mM NaCl at pH 6.8.

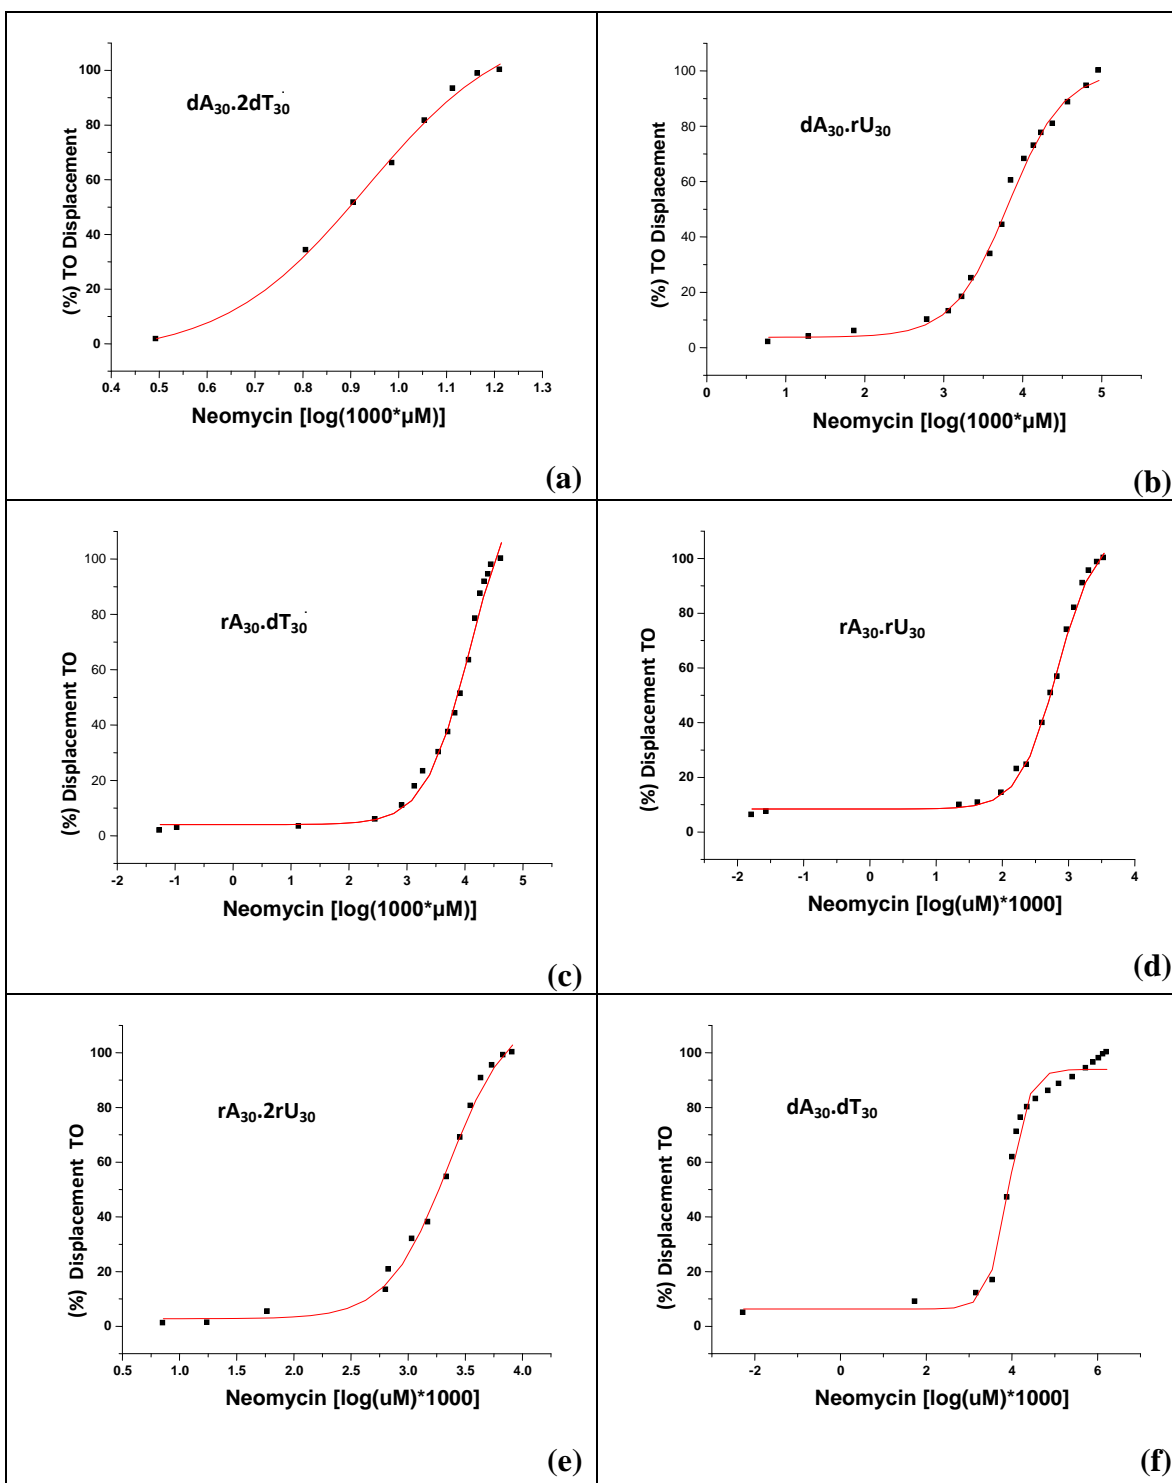

**Figure S7.** Sigmoidal curve fits for neomycin FID titrations into (a)  $dA_{30} \cdot 2dT_{30}$ , (b)  $dA_{30} \cdot rU_{30}$ , (c)  $rA_{30} \cdot dT_{30}$ , (d)  $rA_{30} \cdot rU_{30}$ , (e)  $rA_{30} \cdot 2rU_{30}$ , (f)  $dA_{30} \cdot dT_{30}$  oligomers using fluorescence titrations. Experimental conditions: 1.0  $\mu$ M nucleotide, 15.0  $\mu$ M thiazole

orange, 20.0 nM to 5.0 mM aminoglycoside titration. All experiments were carried out in buffer 10 mM sodium cacodylate, 0.5 mM EDTA, 100 mM NaCl at pH 6.8, 10 °C.

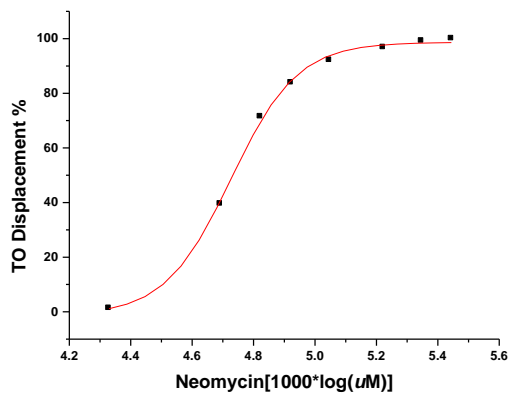

**Figure S8.** Sigmoidal curve fit for neomycin FID titration into  $dA_{30}\cdot 2dT_{30}$  using fluorescence titration. Experiment was carried out in buffer 10 mM sodium cacodylate, 0.5 mM EDTA, 100 mM NaCl and 150 mM KCl at pH 6.8, 10 °C.

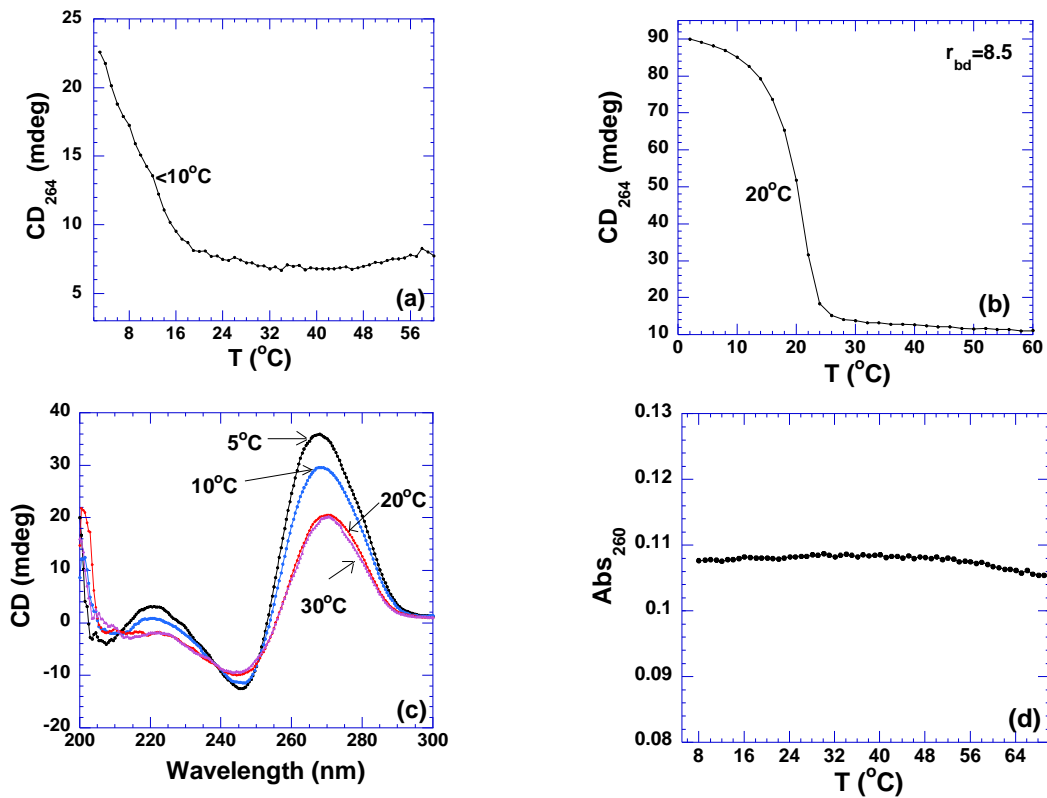

**Figure S9.** CD melting profiles of poly(rU) (100  $\mu$ M/strand) in the absence (a) and presence (b) of neomycin at  $r_{bd}$  8.5 at pH 6.8. (c) CD scan of poly(rU) (100  $\mu$ M/strand) at different temperatures at pH 6.8. (d) UV melting profile of poly(rU) at pH 5.5. Buffer 10 mM sodium cacodylate, 0.5 mM EDTA, 100 mM NaCl.



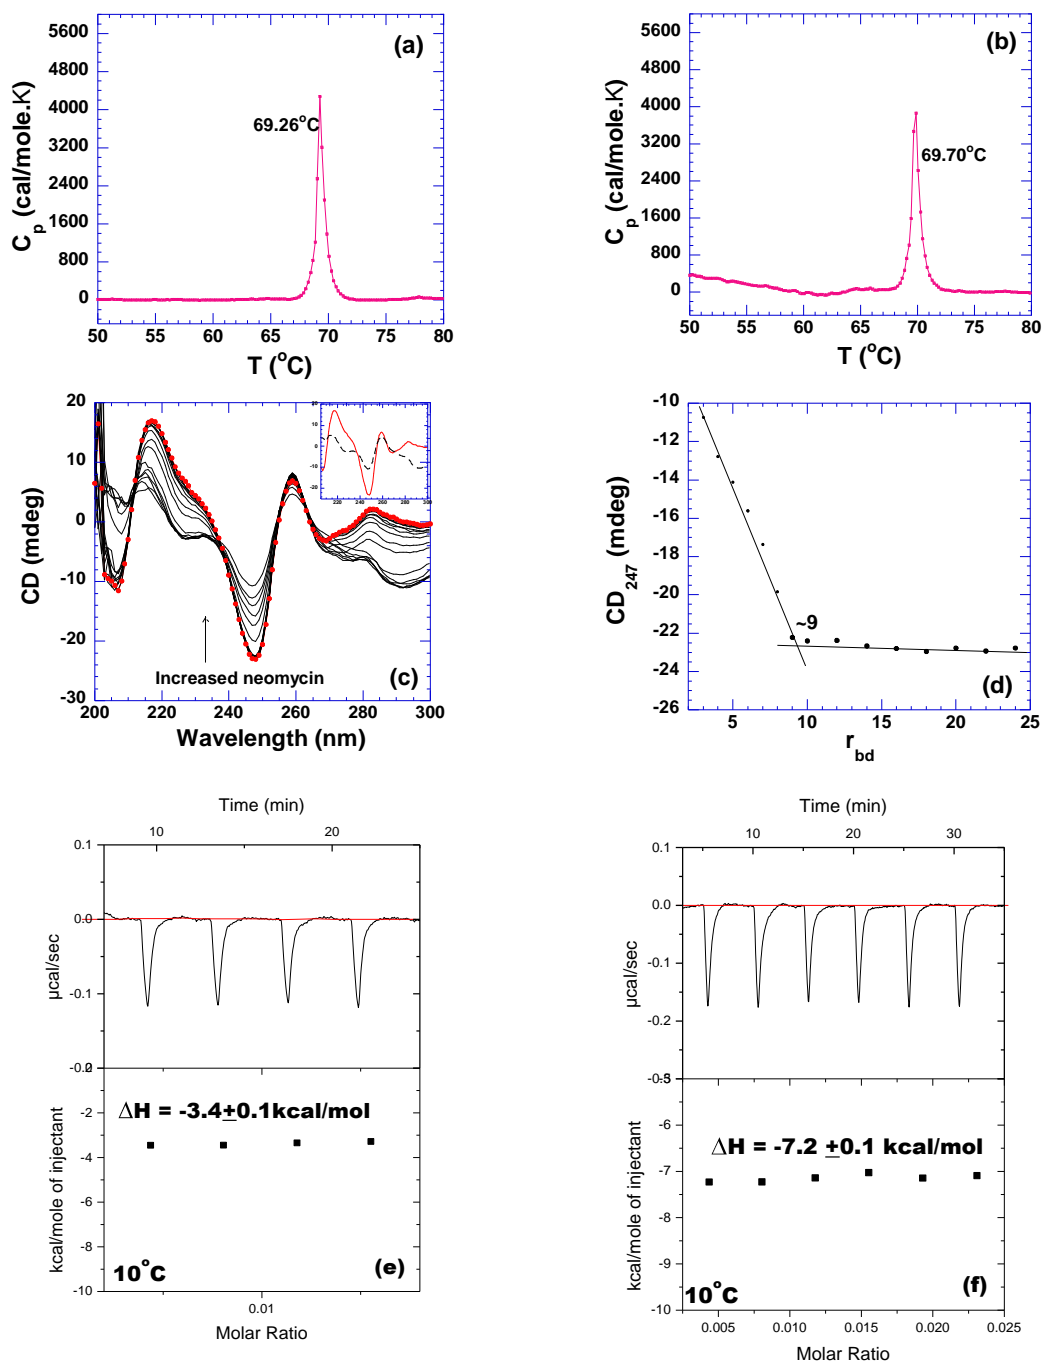

**Figure S10.** (a,b) DSC melting profiles of poly(dA)•poly(dT) (100  $\mu\text{M}$ /base pair) in the absence (a) and presence (b) of neomycin at  $r_{bd}$  9. (c) CD scans of neomycin titration with poly(dA)•poly(dT) (75  $\mu\text{M}$ /base pair). The scan with solid circle represents DNA alone. The inset shows the CD spectra of DNA alone (continuous line) and ligand-

saturated complex (dashed line). (d) A plot of CD signals at 247 nm *versus* corresponding  $r_{bd}$  values. The cross of two apparent linear portions reveals binding site sites. (e) ITC titration of neomycin into poly(dA-dT)<sub>2</sub> (150 μM/base pair) at 10 °C and (f) ITC titration of neomycin into poly(dA)•poly(dT) (150 μM/base pair) 10 °C. All experiments were carried out in buffer 10 mM sodium cacodylate, 0.5 mM EDTA, 100 mM NaCl at pH 6.8.

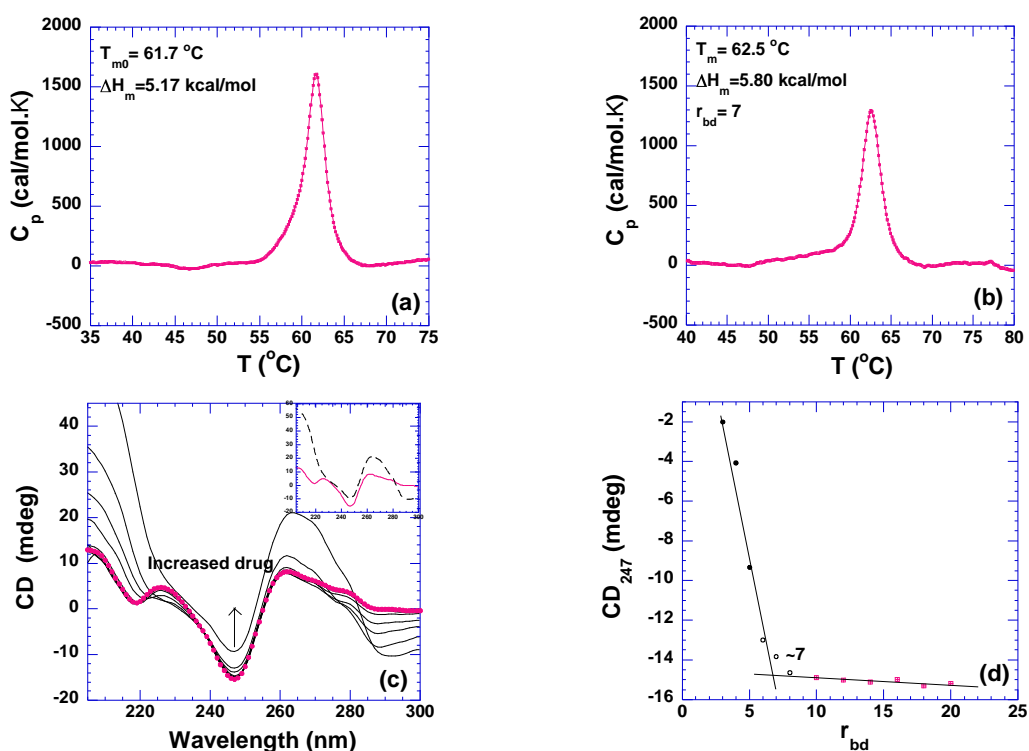

**Figure S11.** (a,b) DSC melting profiles of poly(dA-dT)<sub>2</sub> (100 μM/base pair) in the absence (a) and presence (b) of neomycin. (c) CD scans of neomycin titration with poly(dA-dT)<sub>2</sub> (75 μM/base pair). The scan with solid circle represents DNA alone. The inset shows CD spectra of DNA alone (continuous line) and ligand-saturated complex (dashed line). (d) A plot of CD signals at 247 nm *versus* corresponding  $r_{bd}$  values. All experiments were carried out in buffer 10 mM sodium cacodylate, 0.5 mM EDTA, 100

mM NaCl at pH 6.8.

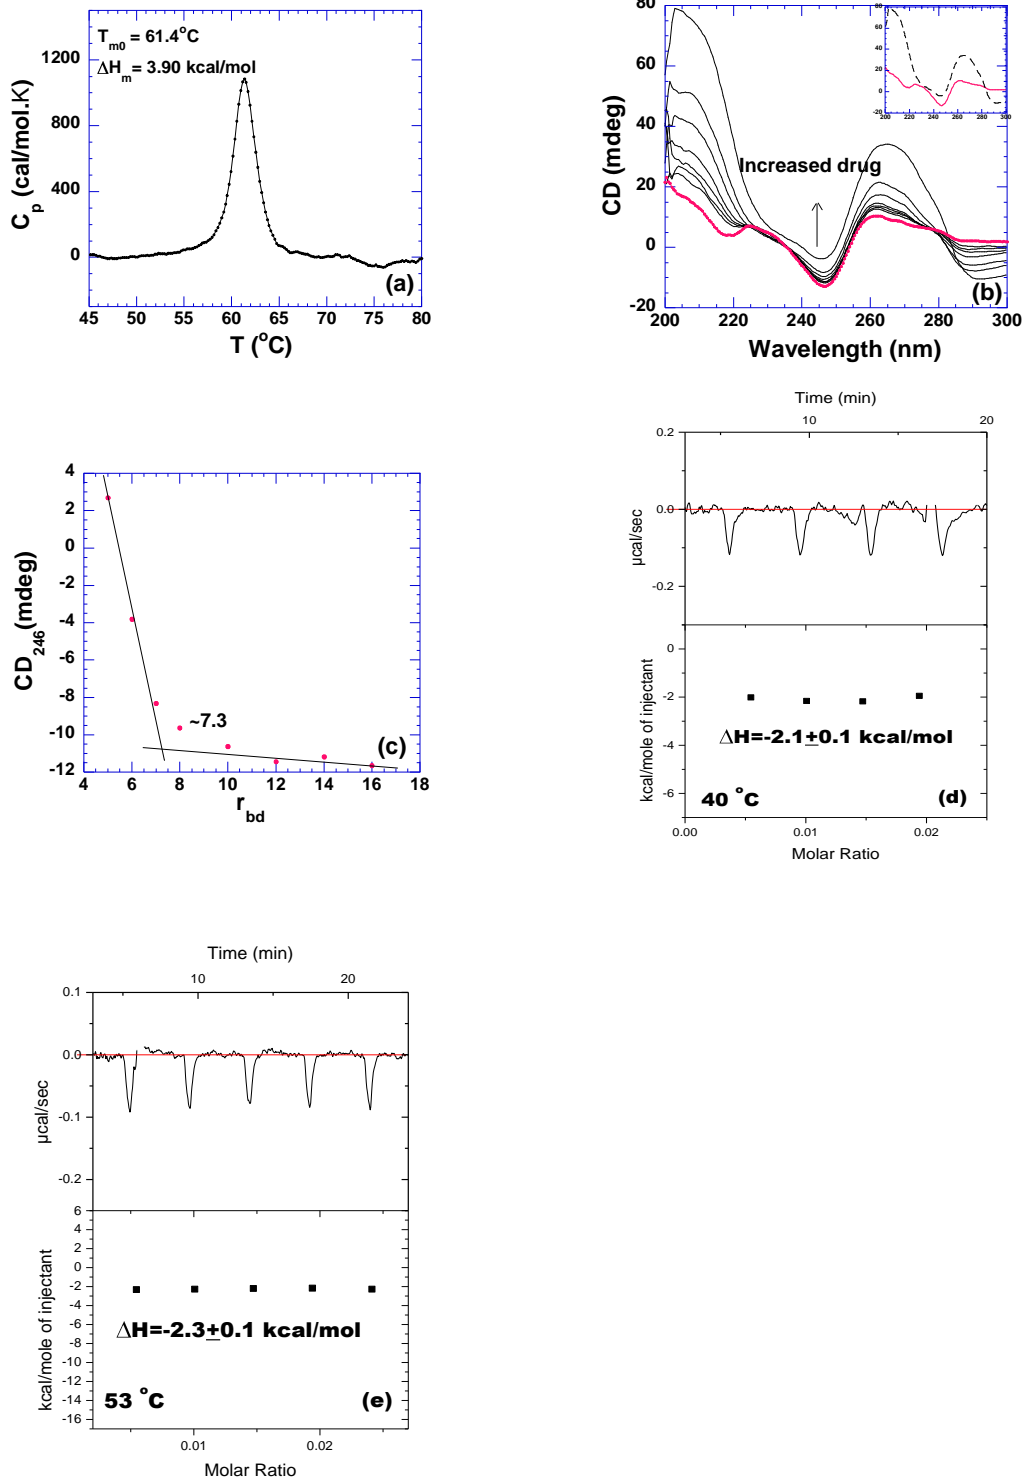

Figure S12. (a) DSC melting profiles of poly(dA-dT)<sub>2</sub> (100  $\mu\text{M}$ /base pair) in the absence

of neomycin. (b) CD scans of neomycin titration with poly(dA-dT)<sub>2</sub> (75 μM/base pair). The scan with solid circle represents DNA alone. The inset is the CD spectra of DNA alone (continuous line) and ligand-saturated complex (dashed line). (c) A plot of CD signals at 246 nm *versus* corresponding  $r_{bd}$  values. (d,e) ITC titration of neomycin into poly(dA-dT)<sub>2</sub> (300 μM/base pair) at 40 °C (e) and 53 °C (f). All experiments were carried out in buffer 10 mM sodium cacodylate, 0.5 mM EDTA, 100 mM NaCl at pH 5.5.

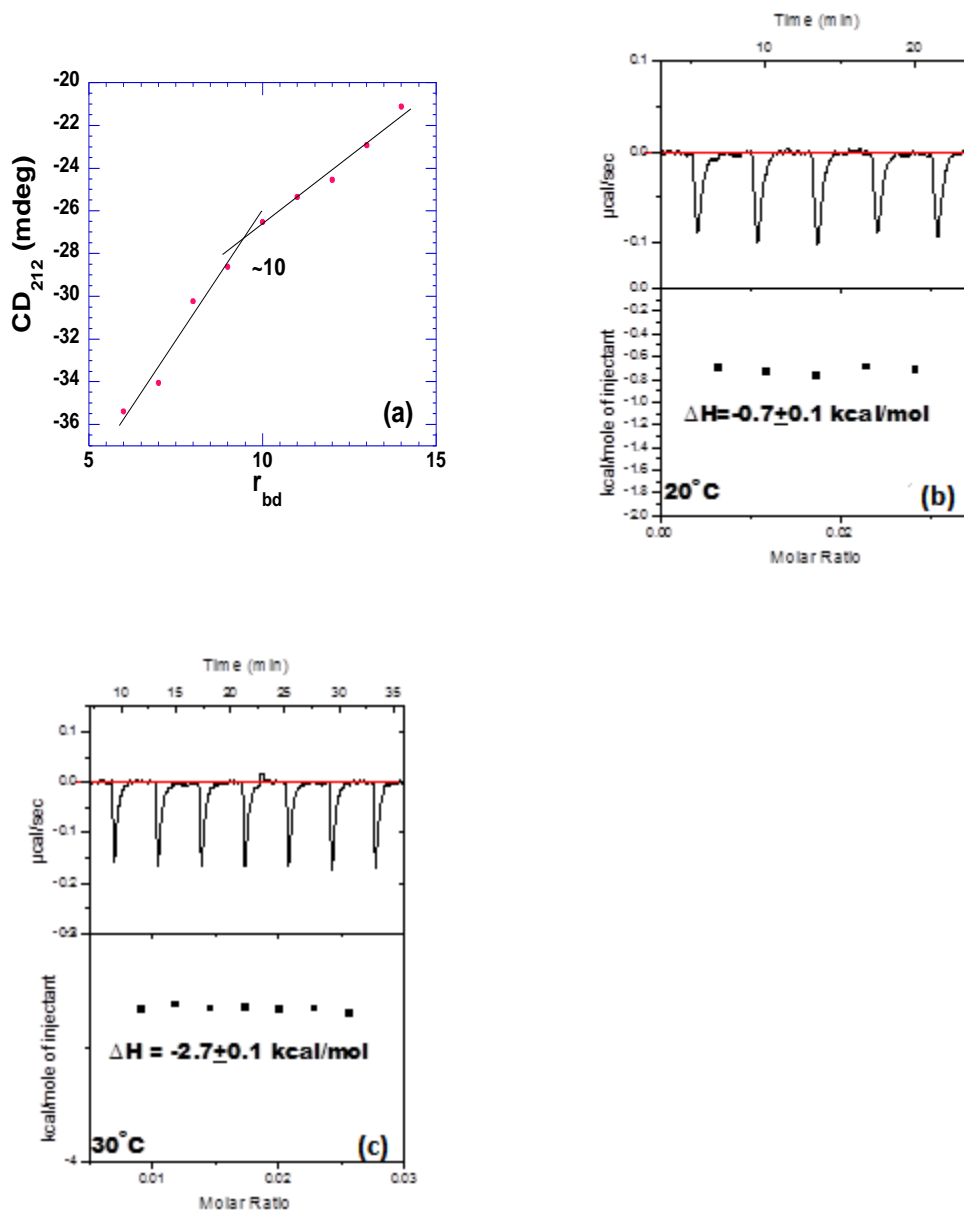

**Figure S13.** (a) A plot of  $d(A_2G_{15}C_{15}T_2)_2$  CD signals at 212nm vs. corresponding  $r_{bd}$  values. (b,c) ITC titration of neomycin into  $d(A_2G_{15}C_{15}T_2)_2$  (15  $\mu\text{M}/\text{duplex}$ ) at (b) 20  $^\circ\text{C}$  and (c) 30  $^\circ\text{C}$ . All experiments were carried out in buffer 10 mM sodium cacodylate, 0.5 mM EDTA, 100 mM NaCl at pH 5.5.

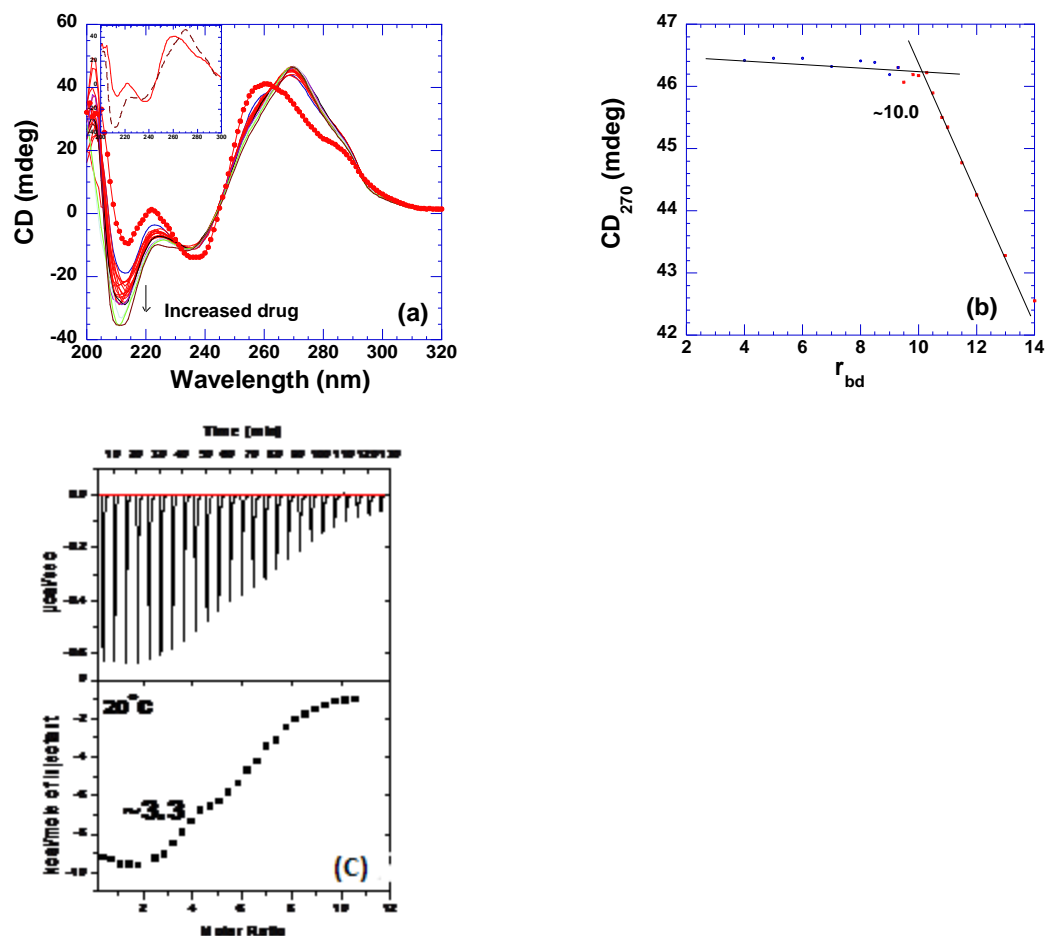

**Figure S14.** (a) CD scans of neomycin titration with DNA duplex  $d(A_2G_{15}C_{15}T_2)_2$  ( $3 \mu\text{M}/\text{duplex}$ ). The scan with solid circle represents DNA alone. The inset shows the CD spectra of DNA alone (continuous line) and ligand-saturated complex (dashed line). (b) A plot of CD signals at 270 nm *versus* corresponding  $r_{bd}$  values. The cross of two apparent linear portions reveals binding site sites. (c) ITC titration of neomycin with  $d(A_2G_{15}C_{15}T_2)_2$  ( $40 \mu\text{M}/\text{duplex}$ ). The binding site size for first binding event was shown in plot. All experiments were carried out in buffer 10 mM sodium cacodylate, 0.5 mM EDTA, 100 mM NaCl at pH 6.8.

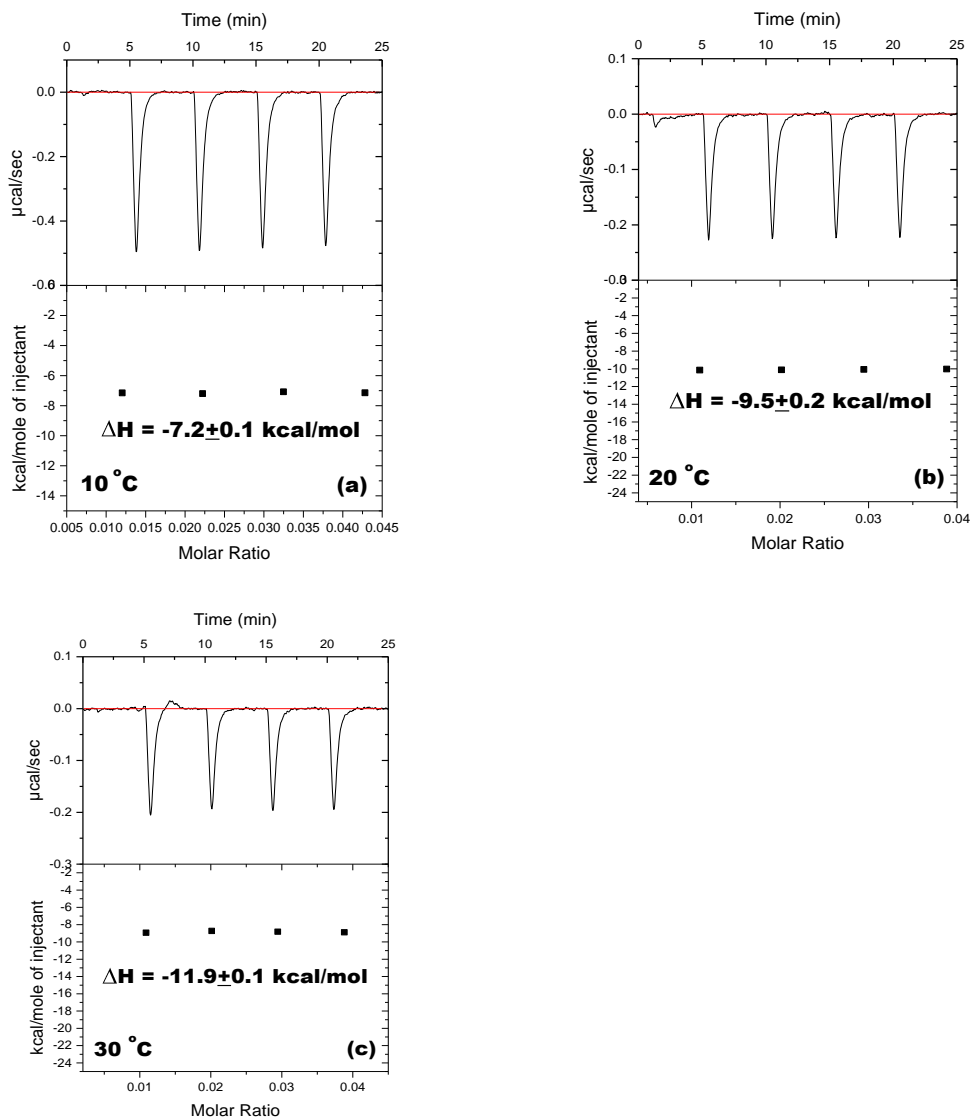

**Figure S15.** ITC titration of neomycin into  $d(\text{A}_2\text{G}_{15}\text{C}_{15}\text{T}_2)_2$  ( $5 \mu\text{M}/\text{duplex}$ ) at (a)  $10^\circ\text{C}$ , (b)  $20^\circ\text{C}$ , and (c)  $30^\circ\text{C}$ . All experiments were carried out in buffer 10 mM sodium cacodylate, 0.5 mM EDTA, 100 mM NaCl at pH 6.8.

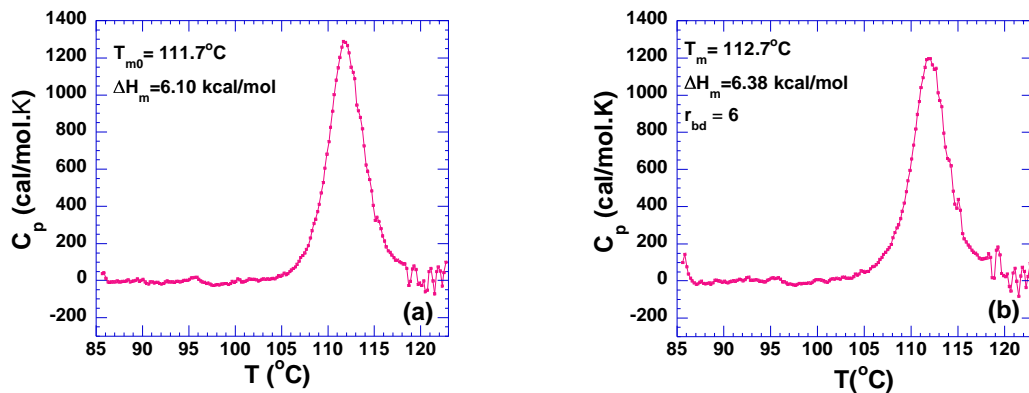

**Figure S16.** DSC melting profiles of poly(dG-dC)<sub>2</sub> (100 μM/base pair) in the absence (a) and presence (b) of neomycin. All experiments were carried out in buffer 10 mM sodium cacodylate, 0.5 mM EDTA, 100 mM NaCl at pH 6.8.



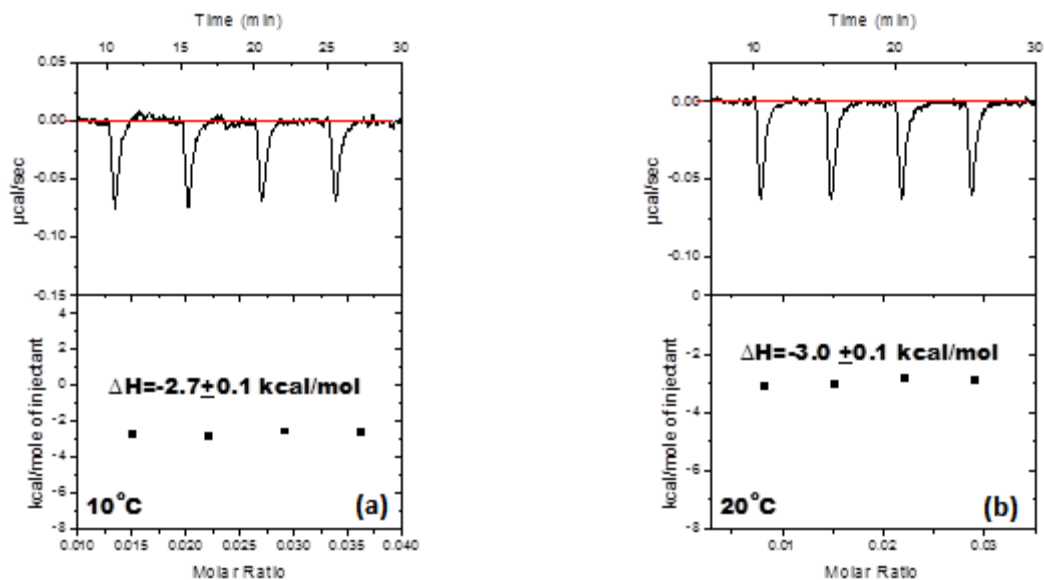

**Figure S17.** (a) ITC titration of neomycin into poly(dG-dC)<sub>2</sub> (75 $\mu\text{M}$ /base pair) at 10 °C and (b) at 20 °C. All experiments were carried out in buffer 10 mM sodium cacodylate, 0.5 mM EDTA, 100 mM NaCl at pH 6.8.

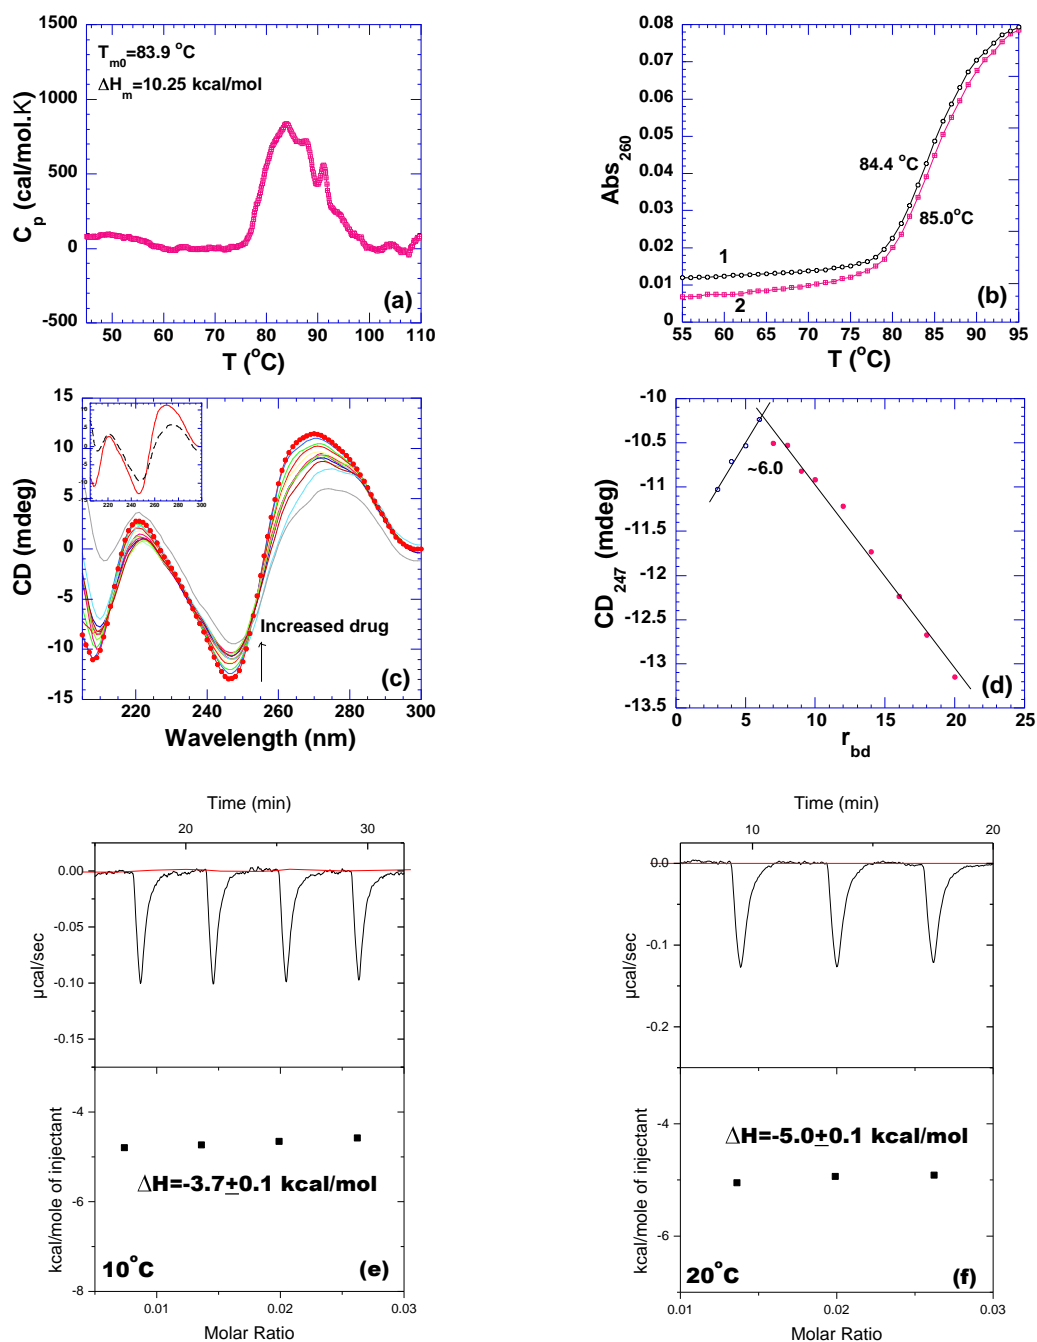

**Figure S18.** (a) DSC melting profiles of calf thymus (75  $\mu\text{M}$ /base pair) in the absence of neomycin. (b) UV melting profiles of duplex in the absence (1) and presence (2) of neomycin at  $r_{bd}$  of 6. (c) CD scans of neomycin titration with calf thymus (40  $\mu\text{M}$ /base pair). The scan with solid circle represents DNA alone. The inset shows the CD spectra

of DNA alone (continuous line) and ligand-saturated complex (dashed line). (d) A plot of CD signals at 247 nm vs. corresponding  $r_{bd}$  values. The cross of two apparent linear portions reveals binding site sites. (e,f) ITC titration of neomycin into calf thymus (100  $\mu\text{M}$ /base pair) at 10  $^{\circ}\text{C}$  (e) and 20  $^{\circ}\text{C}$  (f). All experiments were carried out in buffer 10 mM sodium cacodylate, 0.5 mM EDTA, 100 mM NaCl at pH 6.8.

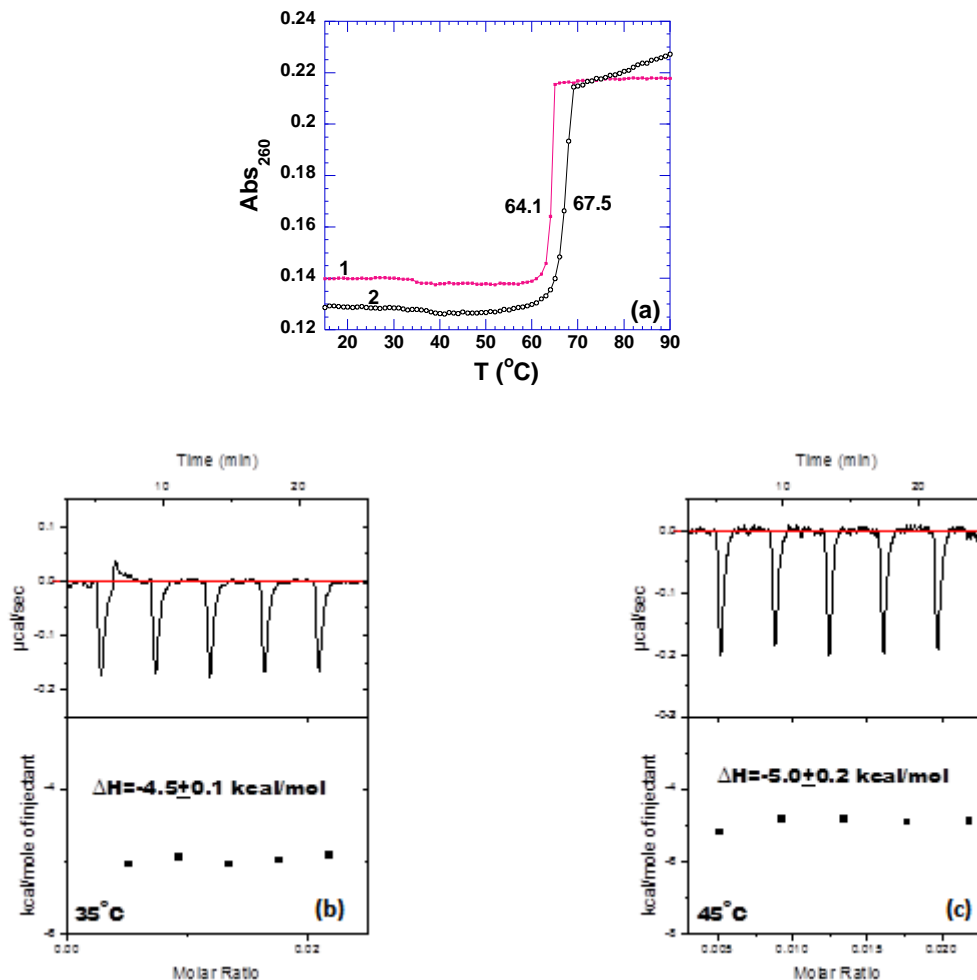

**Figure S19.** (a) UV melting profiles of poly(rA)•poly(dT) duplex in the absence (1) and presence (2) of neomycin at  $r_{bd}$  8. (b,c) ITC titration of neomycin into DNA (100  $\mu\text{M}$ /base pair) at (b) 35  $^{\circ}\text{C}$  and (c) 45  $^{\circ}\text{C}$ . All experiments were carried out in buffer 10 mM sodium cacodylate, 0.5 mM EDTA, 100 mM NaCl at pH 5.5.

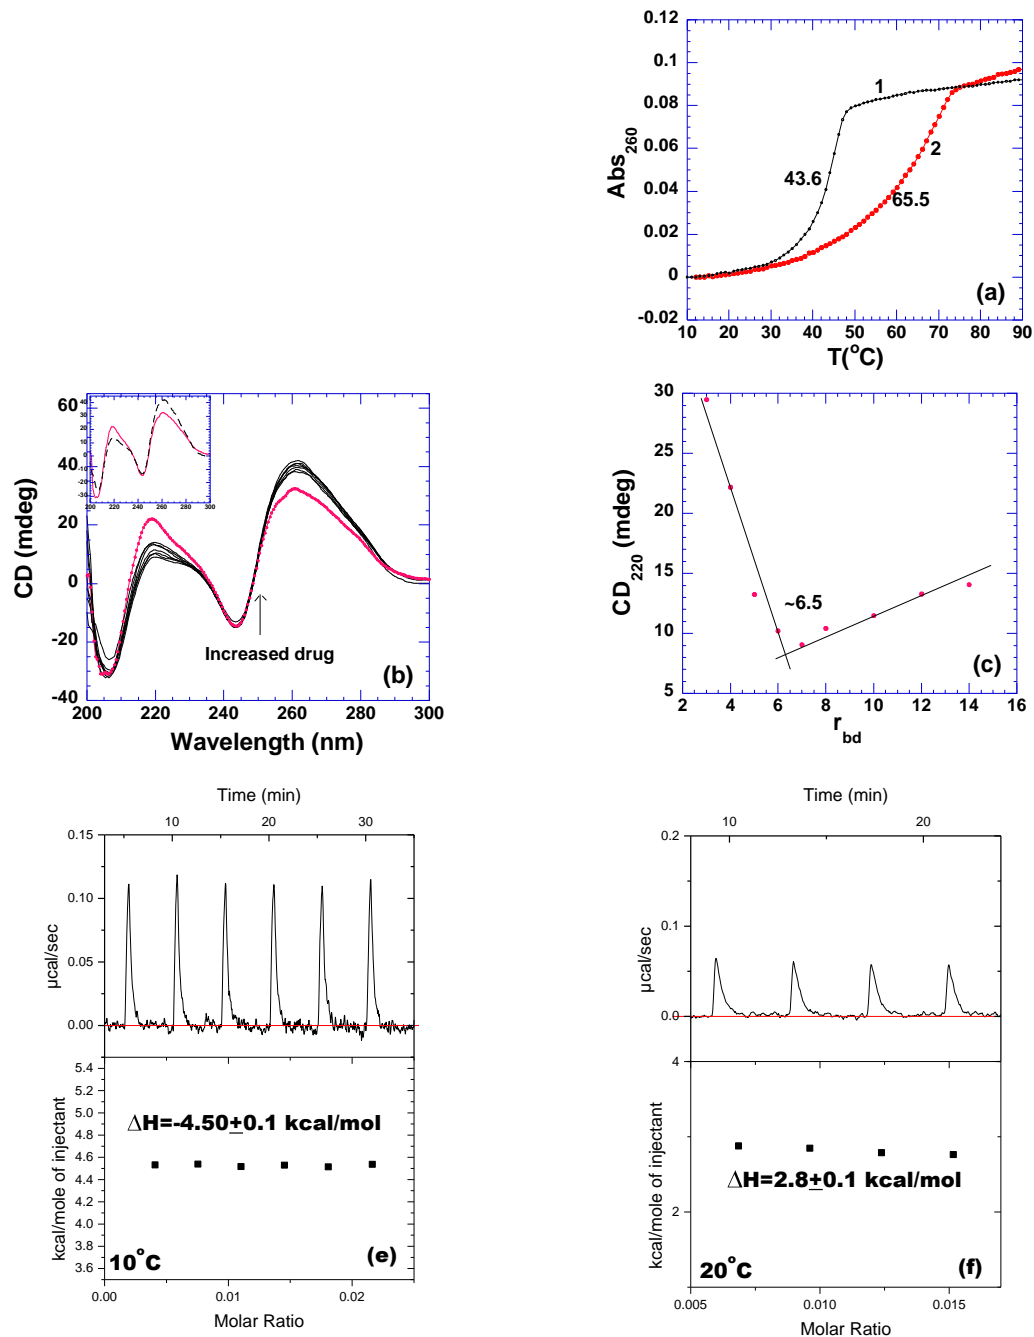

**Figure S20.** (a) UV melting profiles of poly(dA)•poly(rU) duplex in the absence (1) and presence (2) of neomycin at  $r_{bd}$  6.5. (b) CD scans of neomycin titration with poly(dA)•poly(rU) (75  $\mu M$ /base pair). The scan with solid circle represents hybrid alone. The inset shows CD spectra of hybrid alone (continuous line) and ligand-saturated complex (dashed line). (c) A plot of CD signals at 243 nm versus corresponding  $r_{bd}$

values. The cross of two apparent linear portions reveals binding site sites. (d,e) ITC titration of neomycin into target (200  $\mu\text{M}$ /base pair) at (d) 10  $^\circ\text{C}$  and (e) and 20  $^\circ\text{C}$ . All experiments were carried out in buffer 10 mM sodium cacodylate, 0.5 mM EDTA, 100 mM NaCl at pH 5.5.

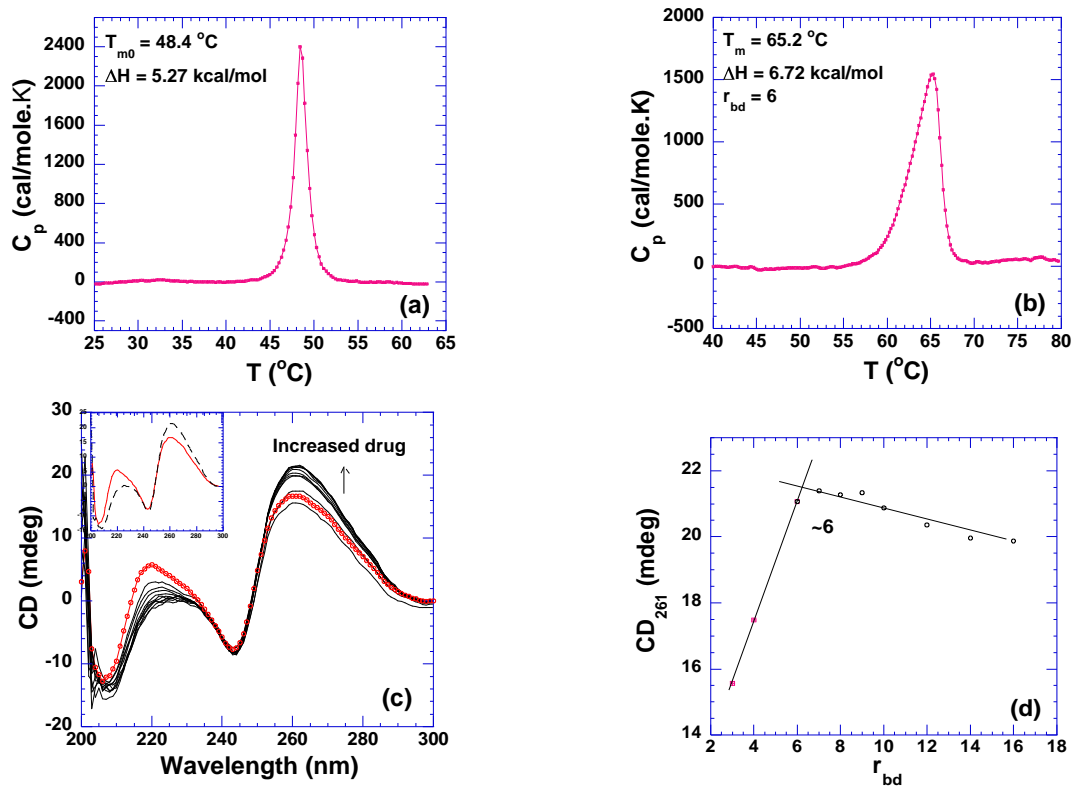

**Figure S21.** (a,b) DSC melting profiles of poly(dA)•poly(rU) (40  $\mu\text{M}$ /base pair) in the absence (a) and presence (b) of neomycin. (c) CD scans of neomycin titration with poly(dA)•poly(rU) (40  $\mu\text{M}$ /base pair). The scan with solid circle represents DNA alone. The inset shows the CD spectra of DNA alone (continuous line) and ligand-saturated complex (dashed line). (d) A plot of CD signals at 261 nm vs. corresponding  $r_{bd}$  values. All experiments were carried out in buffer 10 mM sodium cacodylate, 0.5 mM EDTA, 100 mM NaCl at pH 6.8.

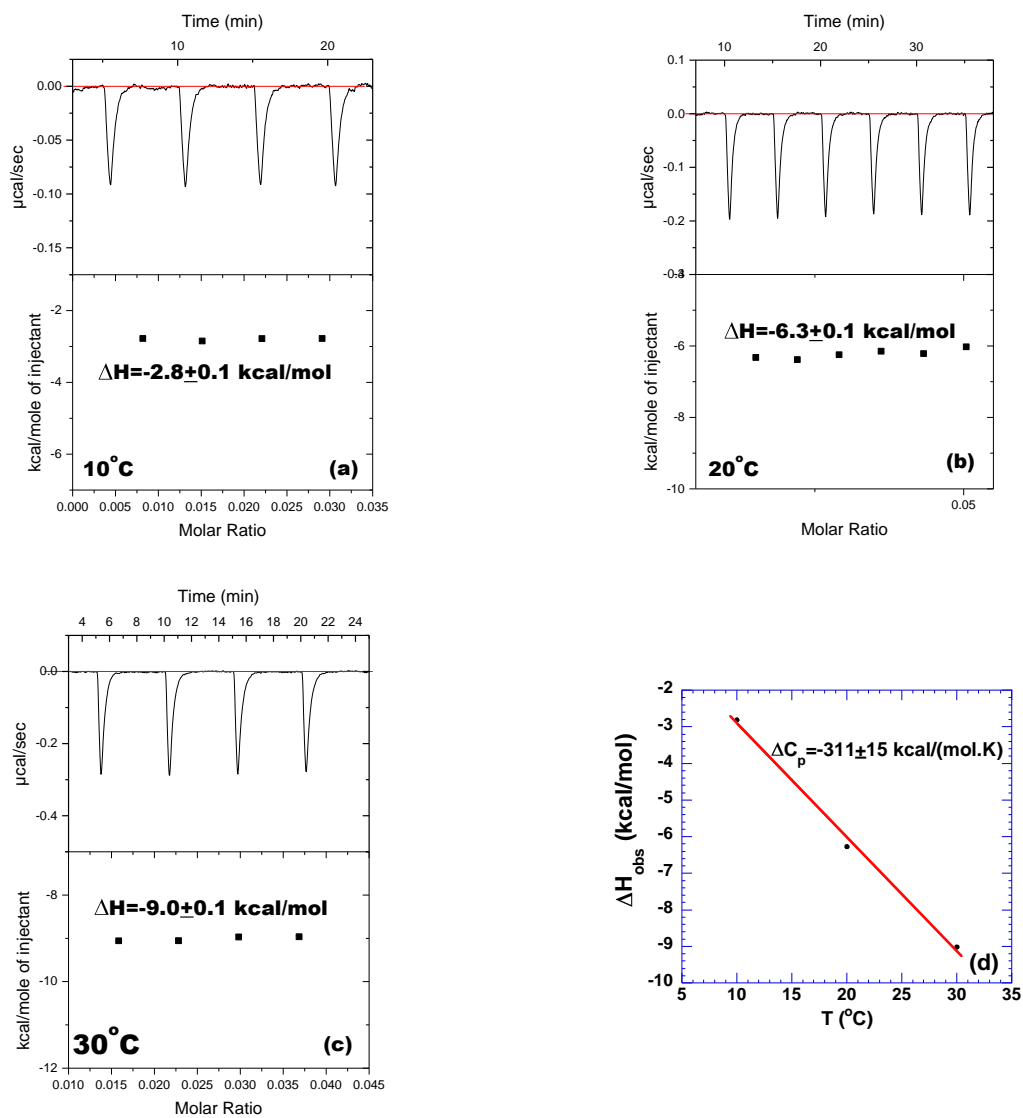

**Figure S22.** ITC titration of neomycin into poly(dA)•poly(rU) (40  $\mu\text{M}$ /base pair) at (a) 10 °C (b) 20 °C (c) and 30 °C (d) A plot of observed binding enthalpy vs. temperature. Slope reveals the heat capacity changes. All experiments were carried out in buffer 10 mM sodium cacodylate, 0.5 mM EDTA, 100 mM NaCl at pH 6.8.

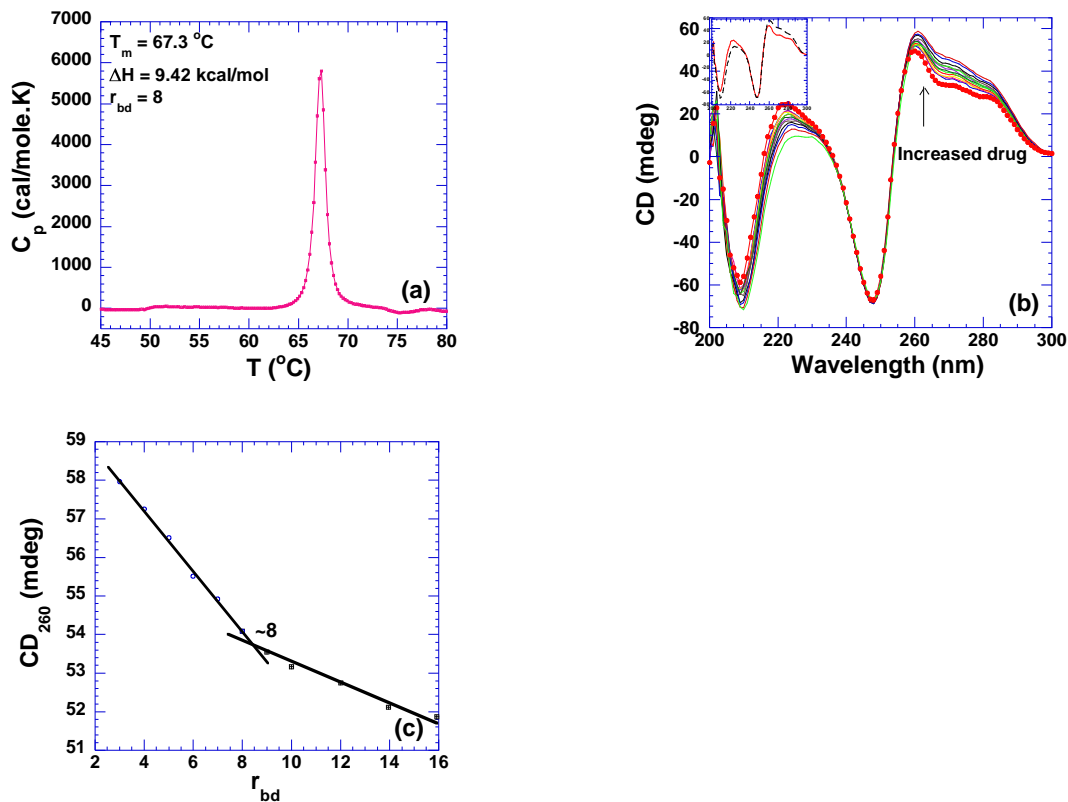

**Figure S23.** (a) DSC melting profiles of poly(rA)•poly(dT) (100  $\mu$ M/base pair) in the presence of neomycin at  $r_{bd}$  8. (b) CD scans of neomycin titration with hybrid duplex. CD scans of neomycin titration with poly(rA)•poly(dT) (100  $\mu$ M/base pair). The scan with solid circle represents hybrid alone. The inset shows CD spectra of hybrid alone (continuous line) and ligand-saturated complex (dashed line). (c) A plot of CD signals at 260 nm vs. corresponding  $r_{bd}$  values. All experiments were carried out in buffer 10 mM sodium cacodylate, 0.5 mM EDTA, 100 mM NaCl at pH 6.8.

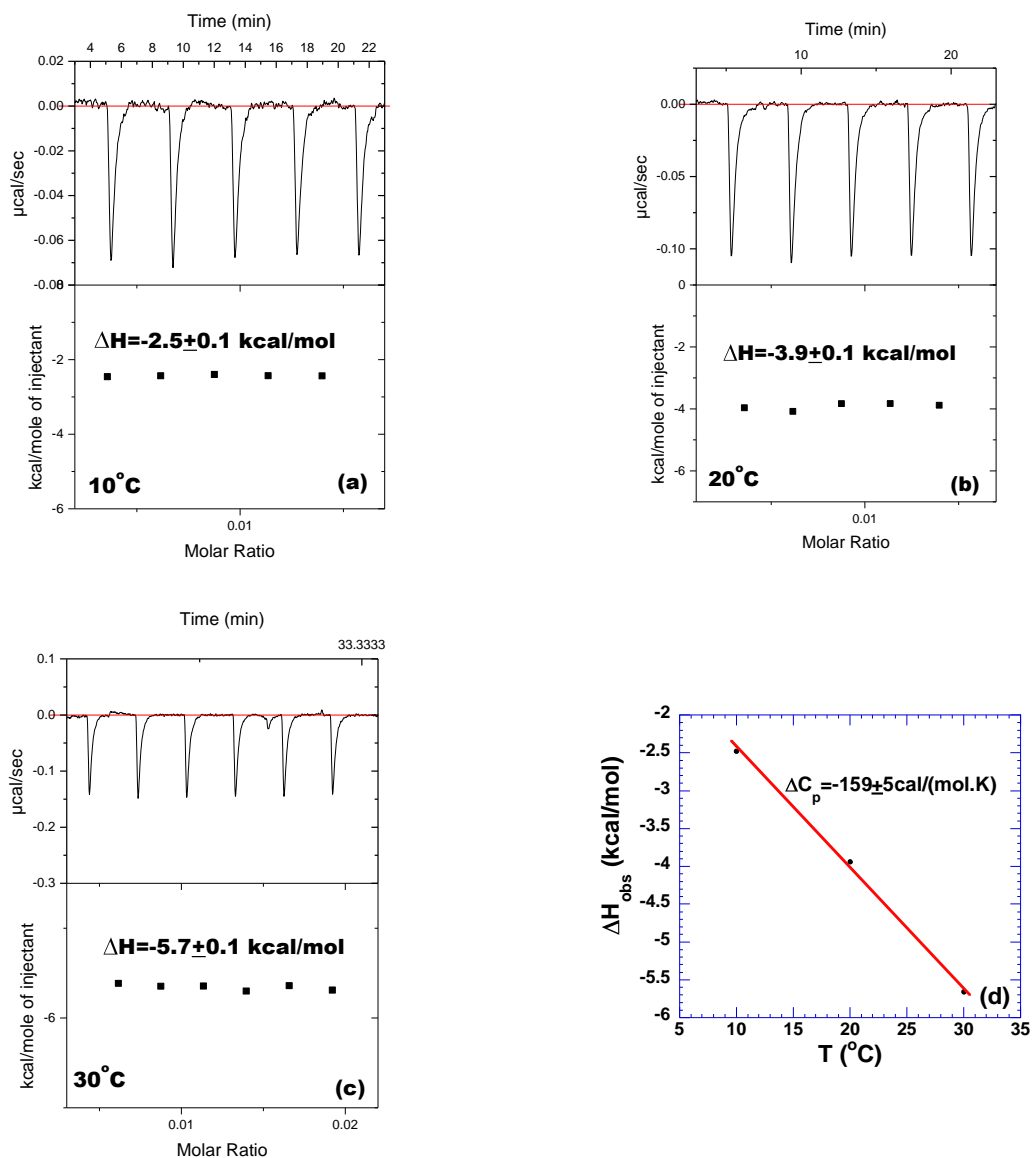

**Figure S24.** ITC titration of neomycin into poly(rA)•poly(dT) (150  $\mu\text{M}$ /base pair) at (a) 10 °C (b) 20 °C (c) and 30 °C. (d) A plot of observed binding enthalpy *versus* temperature. Slope reveals the heat capacity changes. All experiments were carried out in buffer 10 mM sodium cacodylate, 0.5 mM EDTA, 100 mM NaCl at pH 6.8.



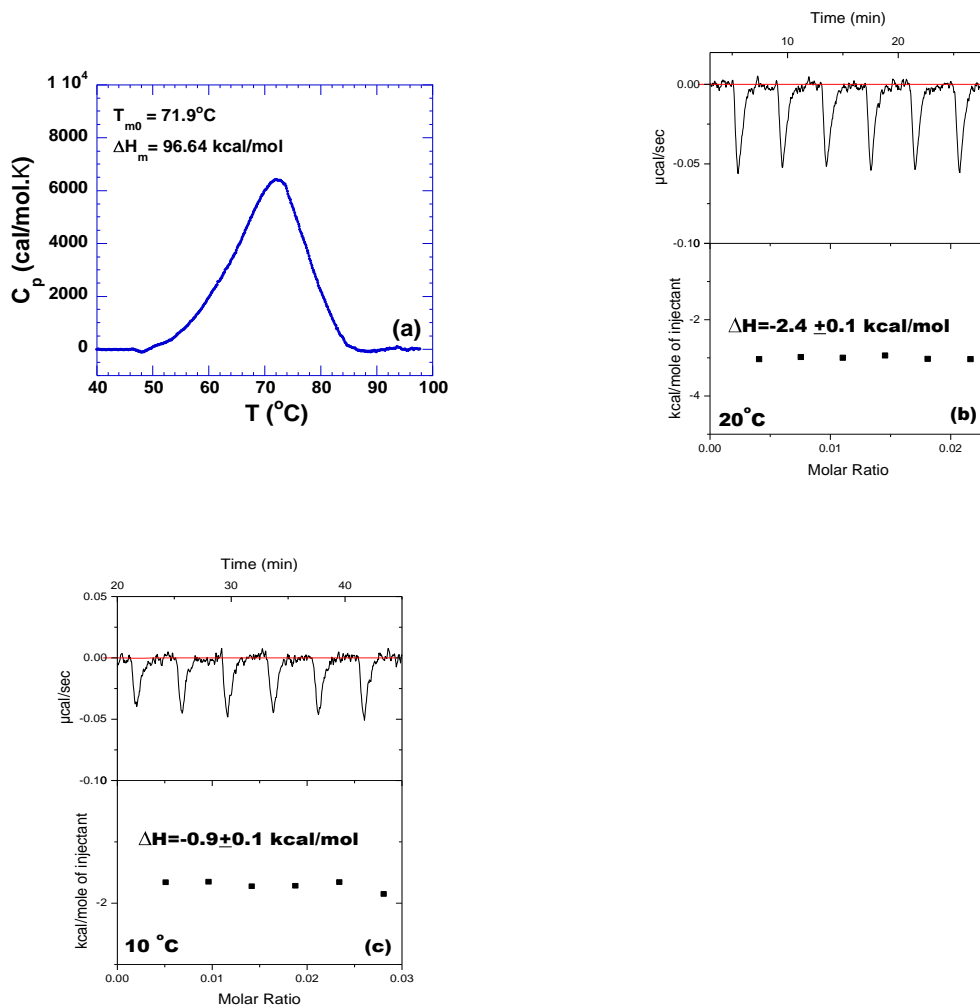

**Figure S25.** (a) DSC melting profiles of 16S A site rRNA (40  $\mu\text{M}$ /strand) in the absence of neomycin. (b,c) ITC titration of neomycin into A site rRNA (10  $\mu\text{M}$ /strand) at (b)  $20^\circ\text{C}$  and (c)  $10^\circ\text{C}$ . All experiments were carried out in buffer 10 mM sodium cacodylate, 0.5 mM EDTA, 100 mM NaCl at pH 5.5.

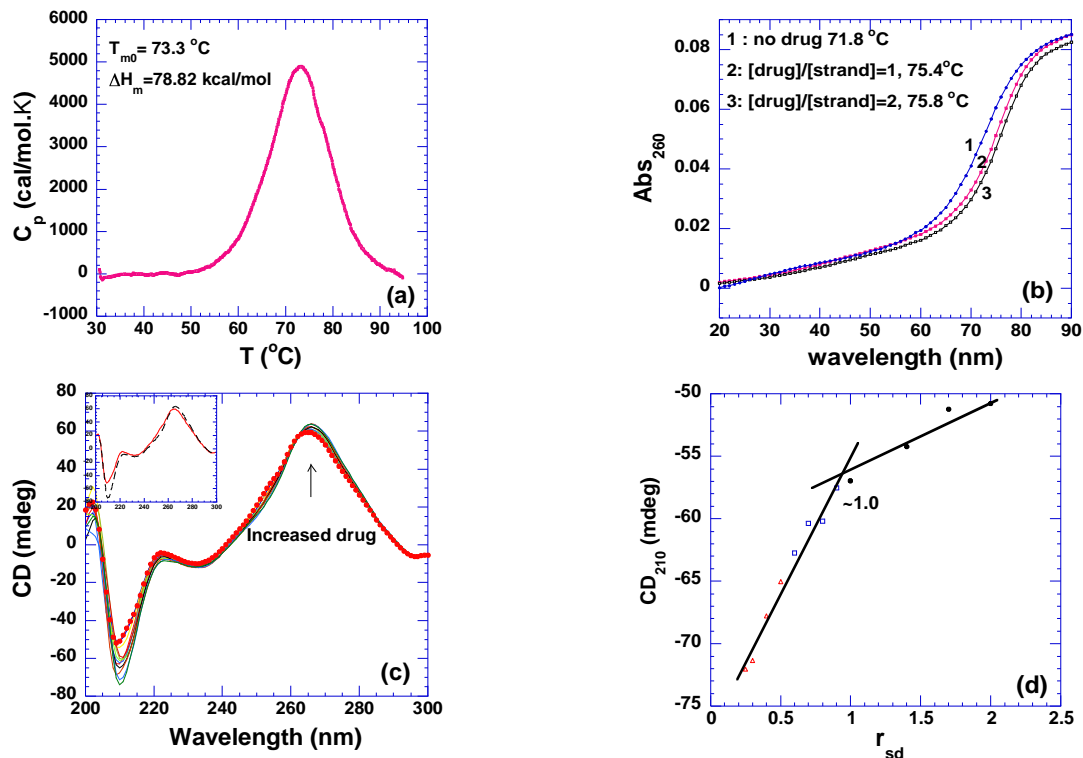

**Figure S26.** (a) DSC melting profiles of 16S A site rRNA (40  $\mu\text{M}/\text{strand}$ ) in the absence of neomycin. (b) Thermal stability of A-site rRNA induced by neomycin at  $r_{\text{dd}}$  1 and 2. (c) CD scans of neomycin titration with A site rRNA (10  $\mu\text{M}/\text{strand}$ ). The scan with solid circle represents RNA alone. The inset shows the CD spectra of RNA alone (continuous line) and drug-saturated complex (dashed line). (d) A plot of CD signals at 210 nm *versus* corresponding  $r_{\text{bd}}$  values. The cross of two apparent linear portions reveals binding site sites. All experiments were carried out in buffer 10 mM sodium cacodylate, 0.5 mM EDTA, 100 mM NaCl at pH 6.8.

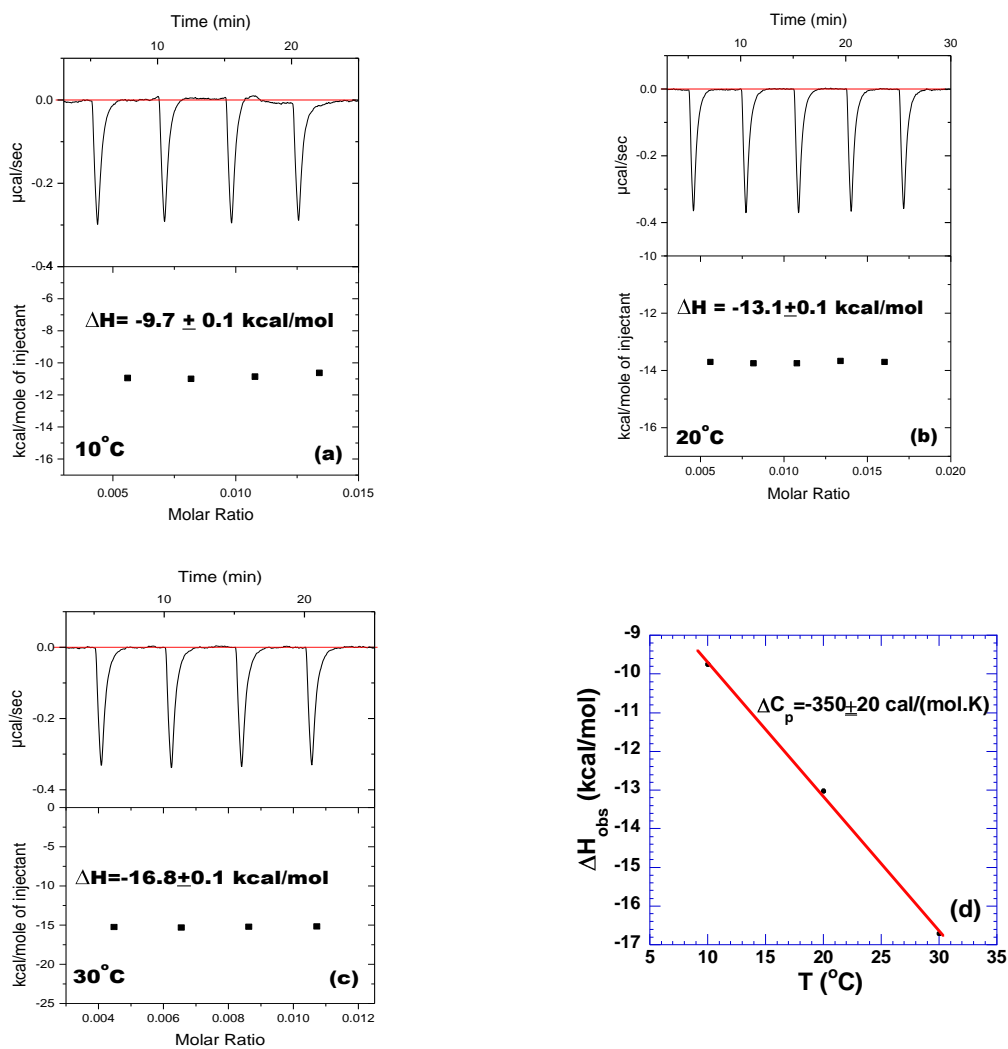

**Figure S27.** ITC titration of neomycin into 16S A site rRNA (10 µM/strand) at (a) 10 °C (b) 20 °C (c) and 30 °C. (d) A plot of ITC derived  $\Delta H$  versus temperatures. All experiments were carried in out buffer 10 mM sodium cacodylate, 0.5 mM EDTA, 100 mM NaCl at pH 6.8.

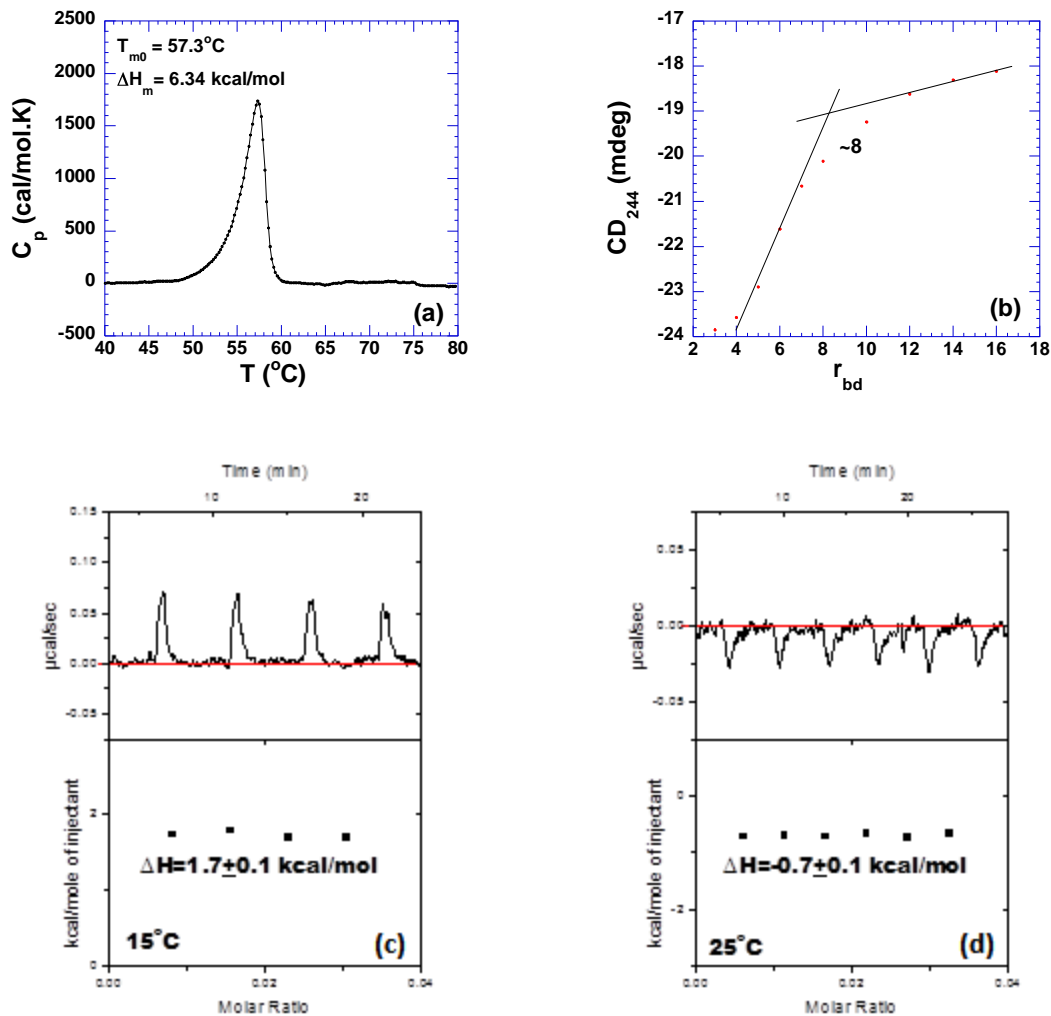

**Figure S28.** (a) DSC melting profiles of poly(rA)•poly(rU) (150 μM/base pair) in the absence of neomycin. (b) CD scans of neomycin titration with poly(rA)•poly(rU)  $r_{bd}$  8 (16 μM/base pair). The inset shows the CD spectra of RNA alone (continuous line) and drug-saturated complex (dashed line). (c,d) ITC titration of neomycin into poly(rA)•poly(rU) (200 μM/base pair) at (c) 15 °C and (d) 20 °C. All experiments were carried out in buffer 10 mM sodium cacodylate, 0.5 mM EDTA, 100 mM NaCl at pH 5.5.

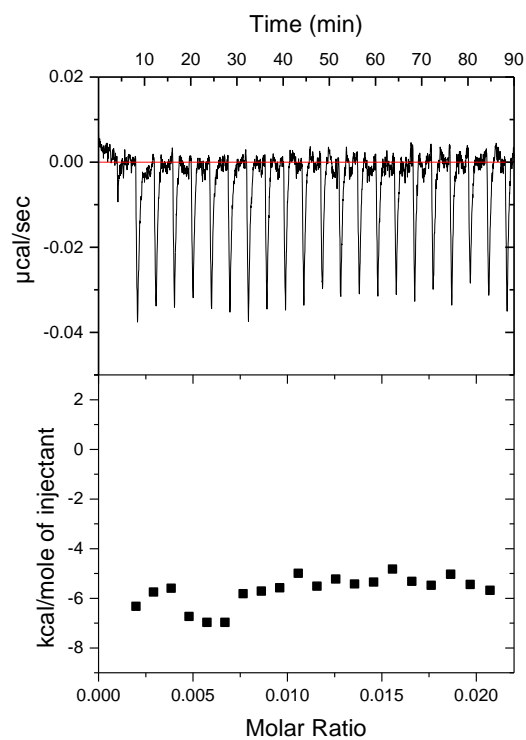

**Figure S29.** ITC excess site titration heat bursts for neomycin into poly(rA).poly(rU) (150  $\mu\text{M}$ /duplex). Experiment was carried out in buffer 10 mM sodium cacodylate, 0.5 mM EDTA, 100 mM NaCl at pH 6.8, 30  $^{\circ}\text{C}$ .

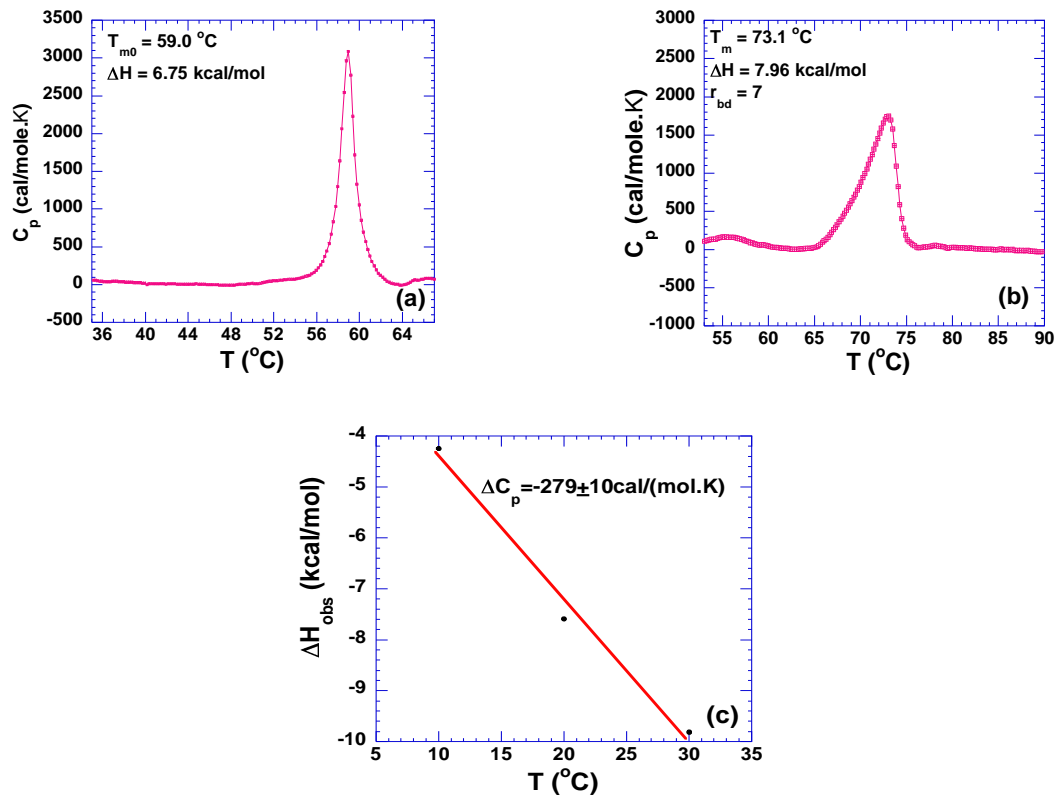

**Figure S30.** (a,b) DSC melting profiles of poly(rA)•poly(rU) (100  $\mu$ M/base pair) in (a) the absence and (b) presence of neomycin. (c) A plot of ITC derived  $\Delta H$  *versus* temperatures. The slope is the heat capacity changes. All experiments were carried out in buffer 10 mM sodium cacodylate, 0.5 mM EDTA, 100 mM NaCl at pH 6.8.

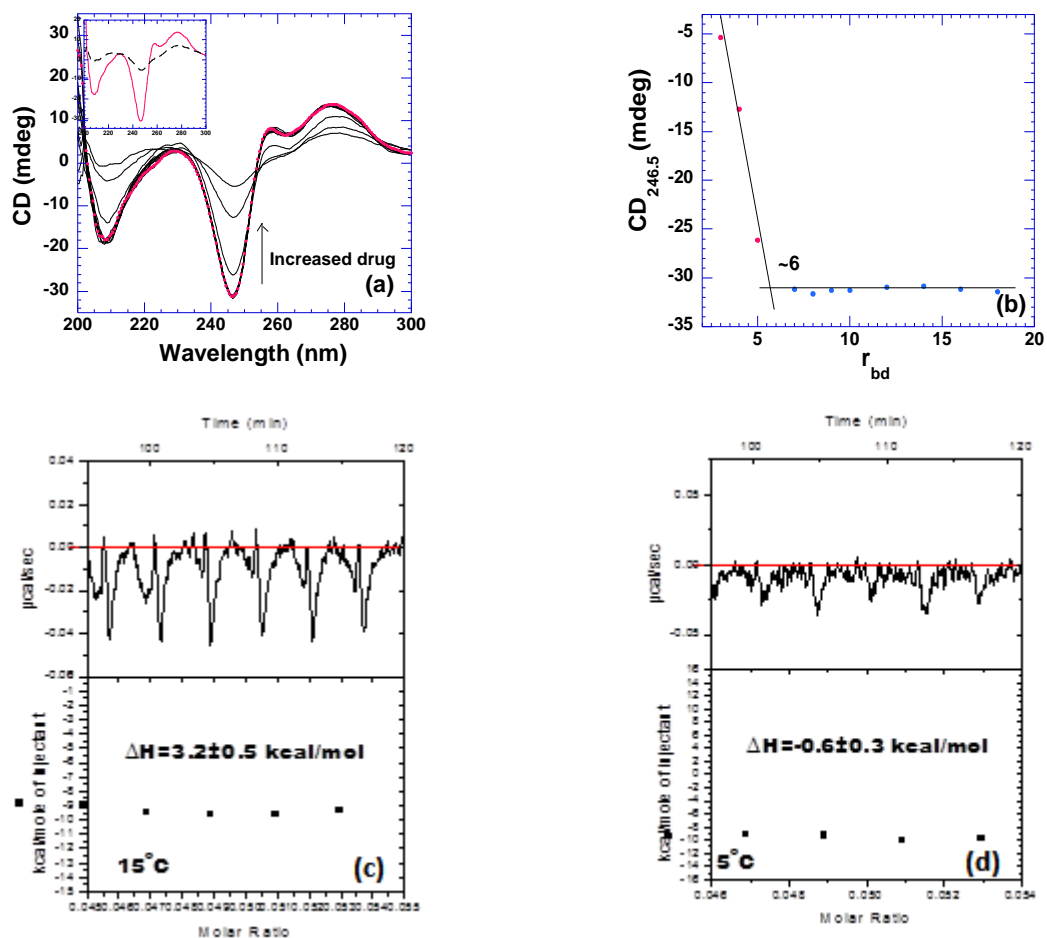

**Figure S31.** (a) CD scans of neomycin titration with poly(dA)•2poly(dT) (75  $\mu$ M/base triplet). The inset shows the CD spectra of RNA alone (continuous line) and drug-saturated complex (dashed line). (b) A plot of CD signals at 246 nm *versus* corresponding  $r_{bd}$  values. The cross of two apparent linear portions reveals binding site size. (c,d) ITC titration of neomycin into poly(dA)•2poly(dT) (100  $\mu$ M/base triplet) at (c) 15  $^{\circ}$ C and (d) 5  $^{\circ}$ C. All experiments were carried out in buffer 10 mM sodium cacodylate, 0.5 mM EDTA, 100 mM NaCl at pH 5.5.

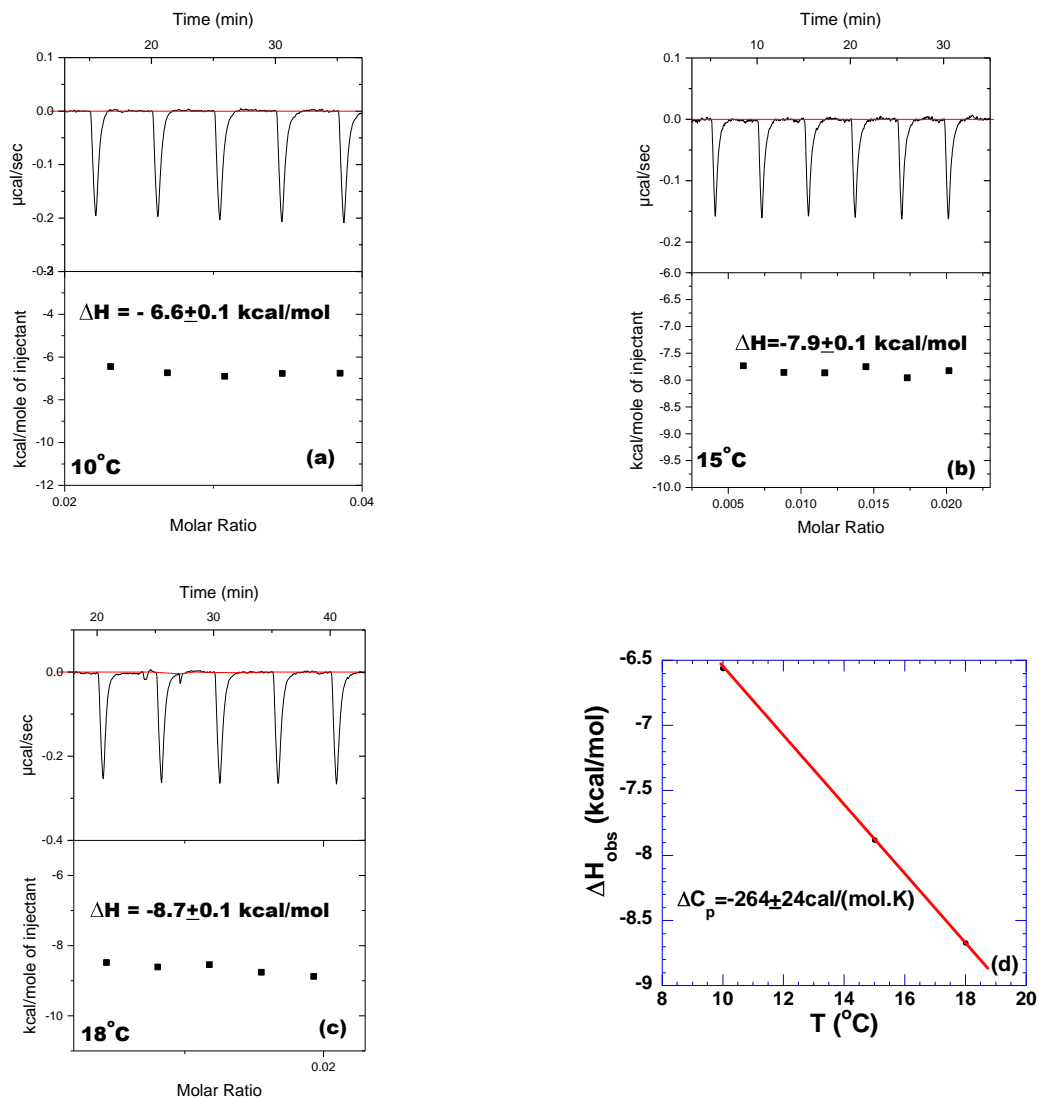

**Figure S32.** ITC titration of neomycin into poly(dA)•2poly(dT) (150 μM/base triplet) at (a) 10 °C, (b) 15 °C, and (c) 18 °C. (d) A plot of ITC derived  $\Delta H$  versus temperatures. All experiments were carried out in buffer 10 mM sodium cacodylate, 0.5 mM EDTA, 100 mM NaCl at pH 6.8.



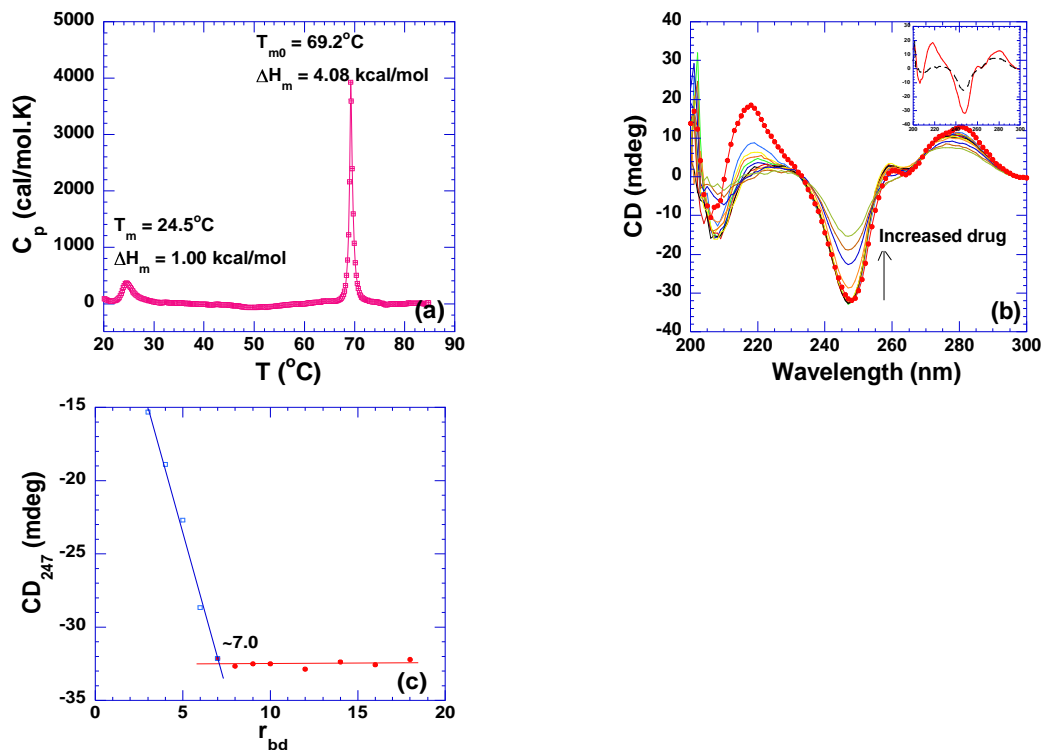

**Figure S33.** (a) DSC melting profiles of poly(dA)•2poly(dT) (100  $\mu$ M/base triplet) in the absence of neomycin. (b) CD scans of neomycin titration with poly(dA)•2poly(dT) (75  $\mu$ M/base triplet). The scan with solid circle represents DNA alone. The inset shows the CD spectra of RNA alone (continuous line) and drug-saturated complex (dashed line). (c) A plot of CD signals at 247 nm vs. corresponding  $r_{bd}$  values. The cross of two apparent linear portions reveals binding site sizes. All experiments were carried out in buffer 10 mM sodium cacodylate, 0.5 mM EDTA, 100 mM NaCl at pH 6.8.

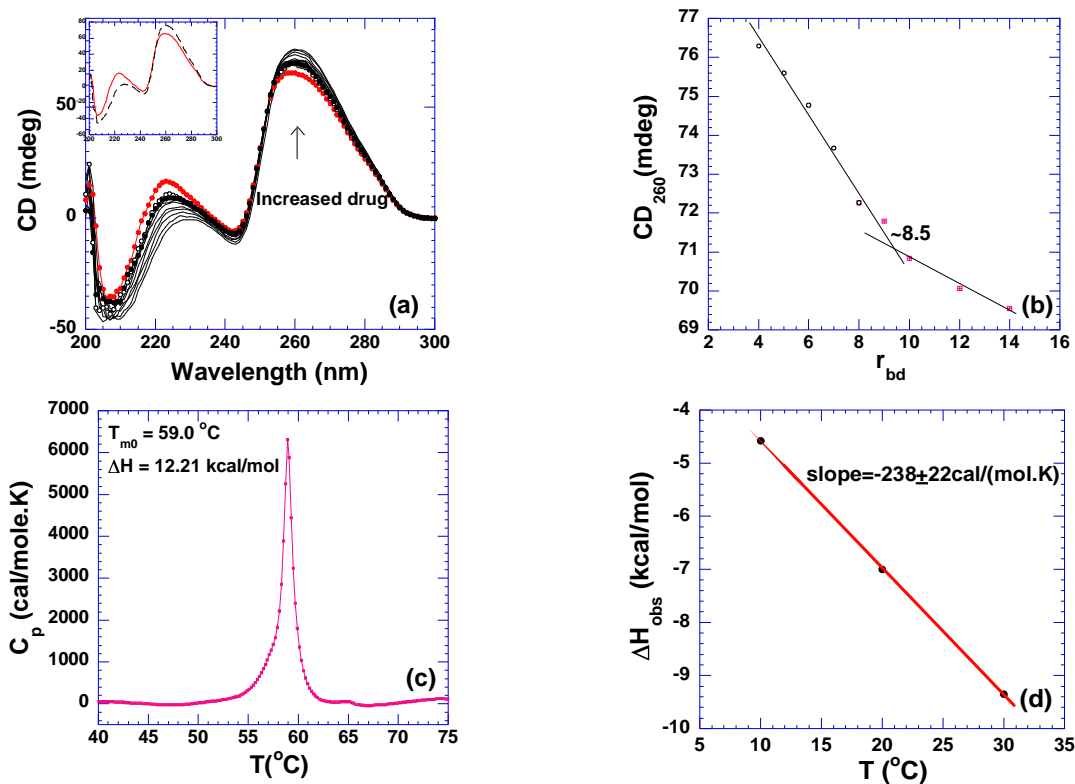

**Figure S34.** (a) CD scans of neomycin titration with poly(rA)•2poly(rU) (75  $\mu$ M/base triplet). The scan with solid circle is the one of RNA alone. The inset shows the CD spectra of RNA alone (continuous line) and drug-saturated complex (dashed line). (b) A plot of CD signals at 260 nm *versus* corresponding  $r_{bd}$  values. The cross of two apparent linear portions reveals binding site sites. (c) DSC melting profile of poly(rA)•2poly(rU) (100  $\mu$ M/base triplet) in the absence of neomycin at  $r_{bd}$  8.5. (d) A plot of ITC derived  $\Delta H_{obs}$  *versus* temperatures. All experiments were carried out in buffer 10 mM sodium cacodylate, 0.5 mM EDTA, 100 mM NaCl at pH 6.8.

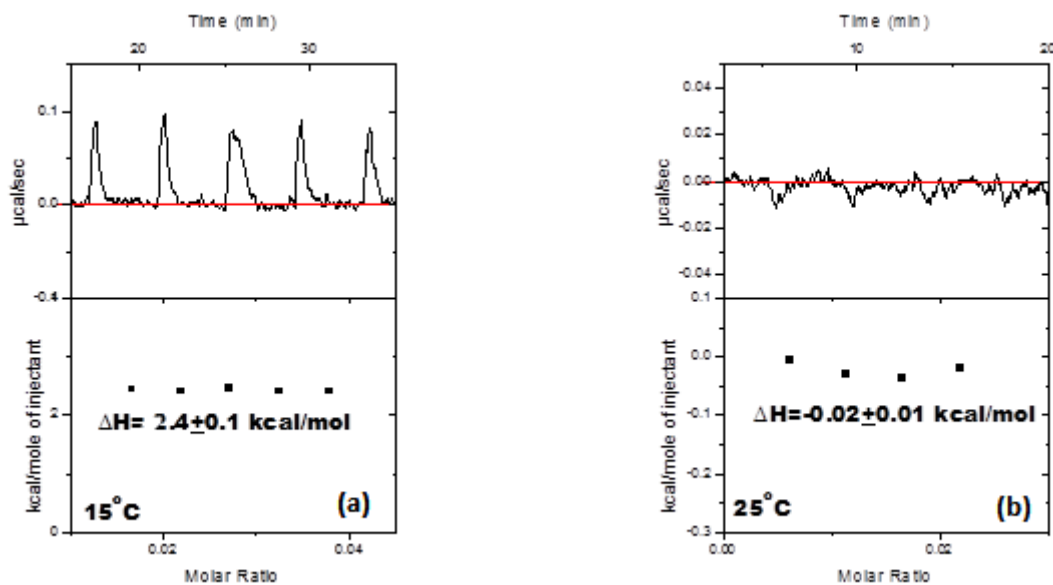

**Figure S35.** (a,b) ITC titration of neomycin into poly(rA)•2poly(rU) (200  $\mu\text{M}$ /base triplet) at (a) 15 °C and (b) 25 °C. All experiments were carried out in buffer 10 mM sodium cacodylate, 0.5 mM EDTA, 100 mM NaCl at pH 5.5.

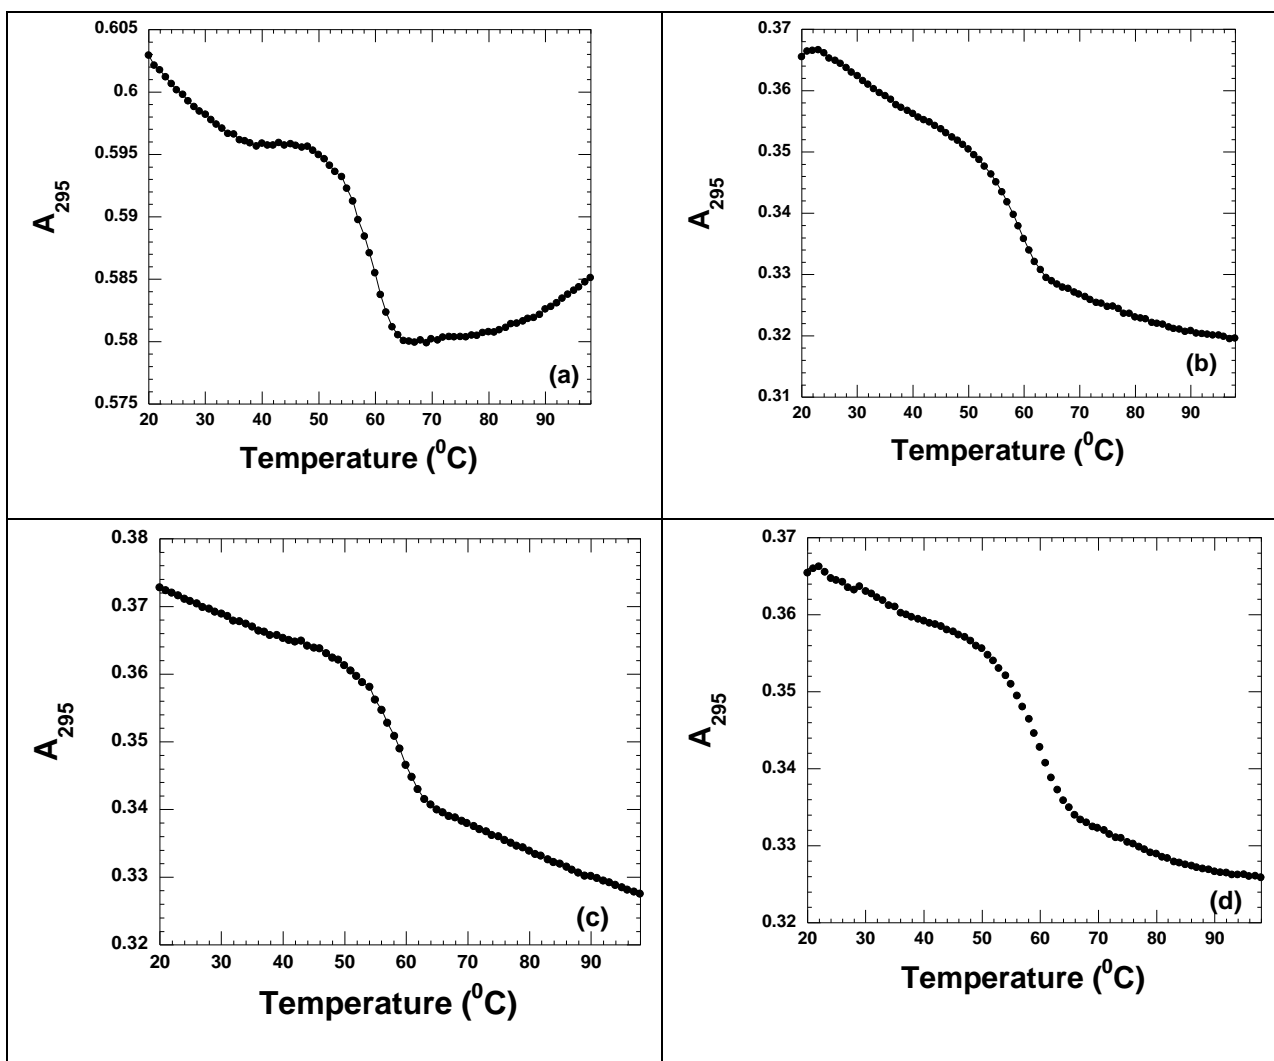

**Figure S36.** UV thermal denaturation profiles of *Oxytricha* telomeric quadruplex in the absence or presence of neomycin (at 1:1 ratio) at different pH (a) in the absence of neomycin at pH 5.5 (b) in the presence of neomycin at pH 5.5 (c) in the absence of neomycin at pH 6.8 (d) in the presence of neomycin at pH 6.8. All experiments were performed in buffer 10 mM sodium cacodylate, 0.5 mM EDTA, 100 mM NaCl. The concentration of DNA was 2  $\mu$ M/strand.

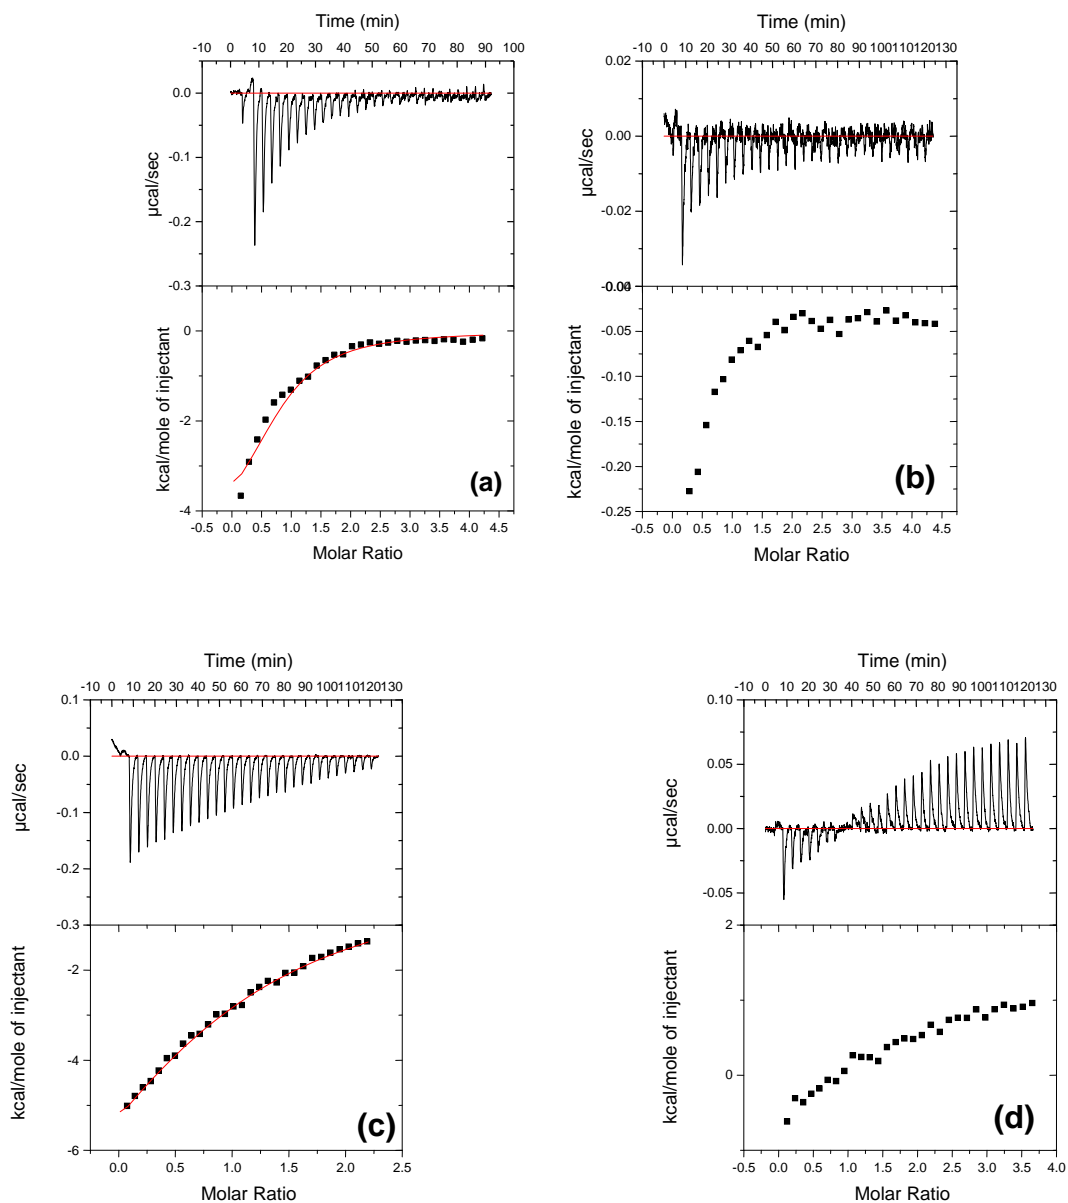

**Figure S37.** ITC titration of neomycin into (a,b) *Oxytricha nova* telomeric DNA (60  $\mu\text{M}$ /strand) and (c,d) human telomeric DNA (60  $\mu\text{M}$ /strand) at pH's 5.5 and 6.8 respectively. The heat burst curves have been corrected for dilution. All experiments were carried out in buffer 10 mM sodium cacodylate, 0.5 mM EDTA, 100 mM NaCl.

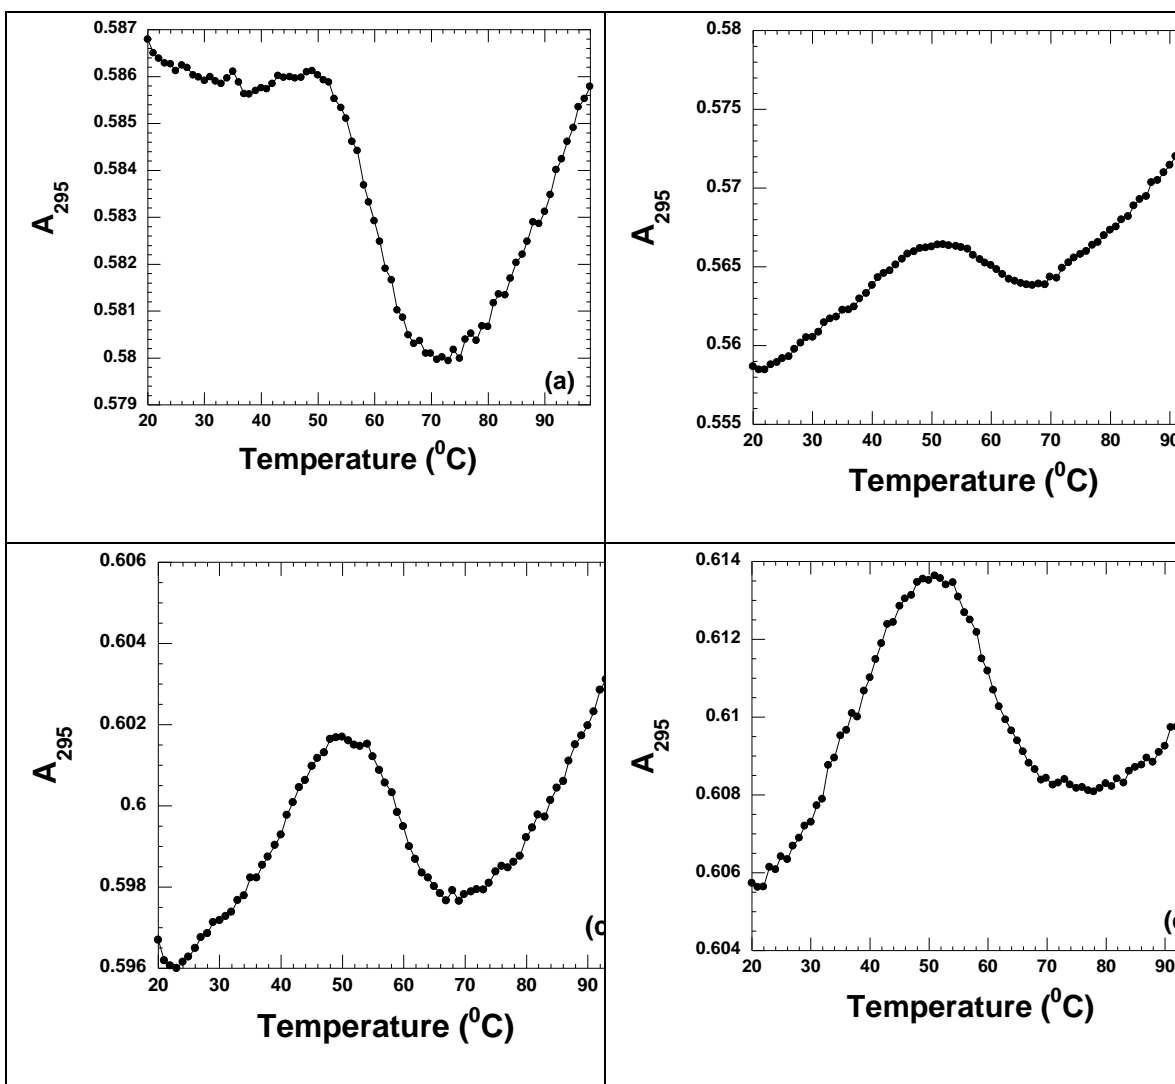

**Figure S38.** UV thermal denaturation profiles of human telomeric quadruplex in the absence or presence of neomycin (at 1:1 ratio) at different pH (a) in the absence of neomycin at pH 5.5 (b) in the presence of neomycin at pH 5.5 (c) in the absence of neomycin at pH 6.8 (d) in the presence of neomycin at pH 6.8. All experiments were performed in buffer 10 mM sodium cacodylate, 0.5 mM EDTA, 100 mM NaCl. The concentration of DNA was 2  $\mu\text{M}$ /strand.

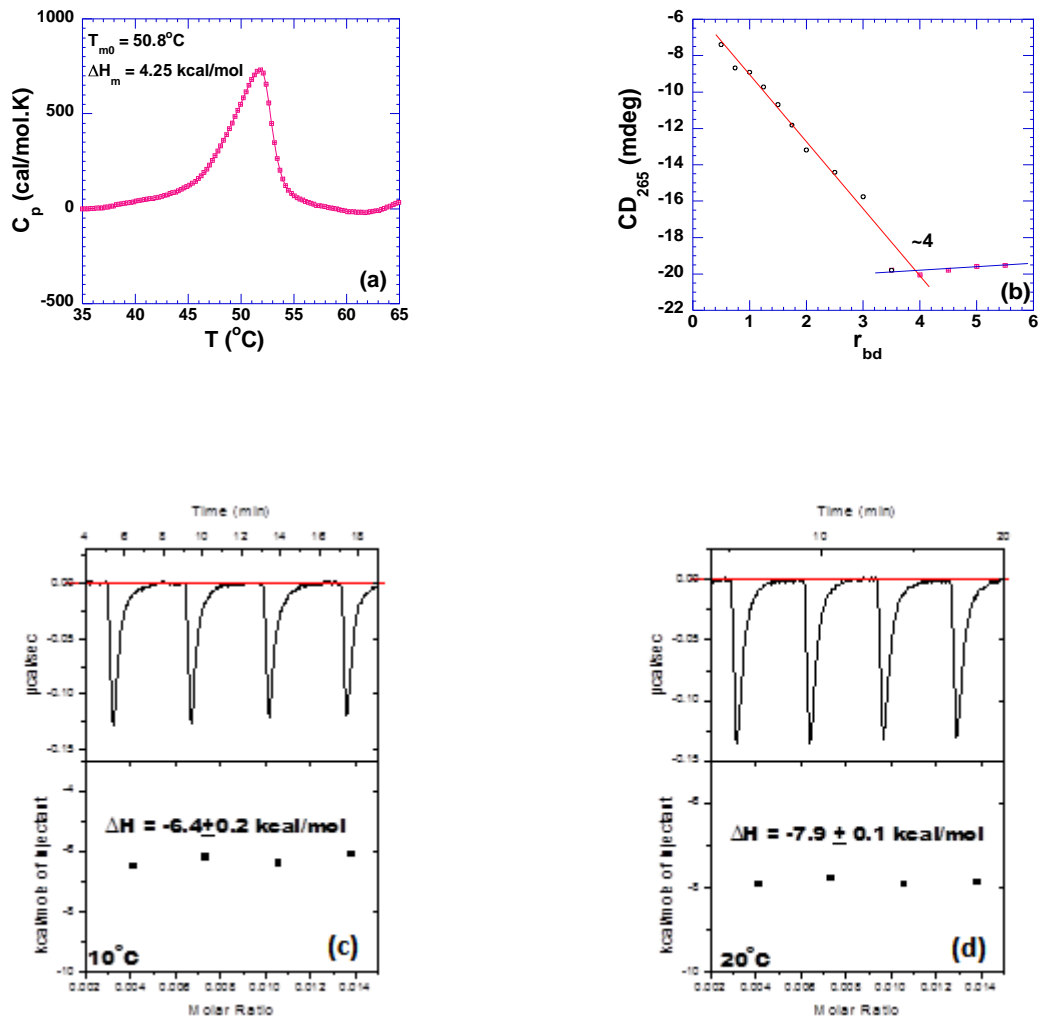

**Figure S39.** (a) DSC melting profiles of i-motif DNA in the absence of neomycin (150  $\mu\text{M}$ /tetrad). (c) A plot of CD signals at 266 nm *versus* corresponding  $r_{bd}$  values. The cross of two apparent linear portions reveals binding site sites. (c,d) ITC titration of neomycin into DNA at (120  $\mu\text{M}$ /tetrad) (c)  $10^\circ\text{C}$  and (d)  $20^\circ\text{C}$ . All experiments were carried out in buffer 10 mM sodium cacodylate, 0.5 mM EDTA, 100 mM NaCl at pH 6.8.

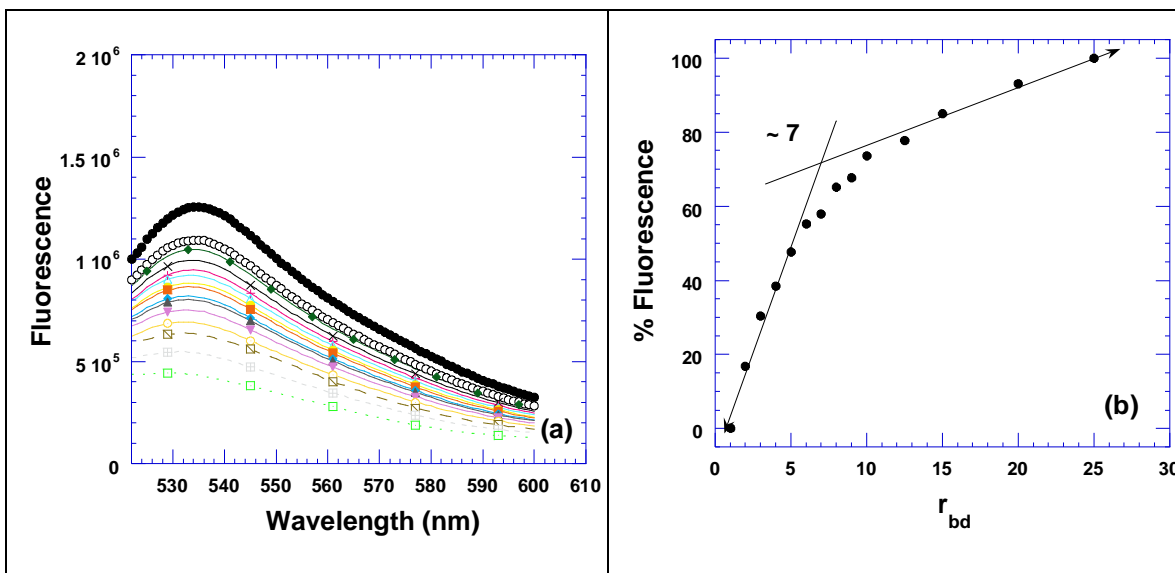

**Figure S40.** (a) Fluorescence titration of neomycin into poly(rA).poly(dT) ( $15 \mu\text{M}/\text{base pair}$ ). (b) A plot of fluorescence intensity *versus* corresponding  $r_{bd}$  values. The cross of two apparent linear portions reveals  $r_{bd} \sim 7$ . Experiment was carried out in buffer 10 mM sodium cacodylate, 0.5 mM EDTA, 100 mM NaCl at pH 6.8.

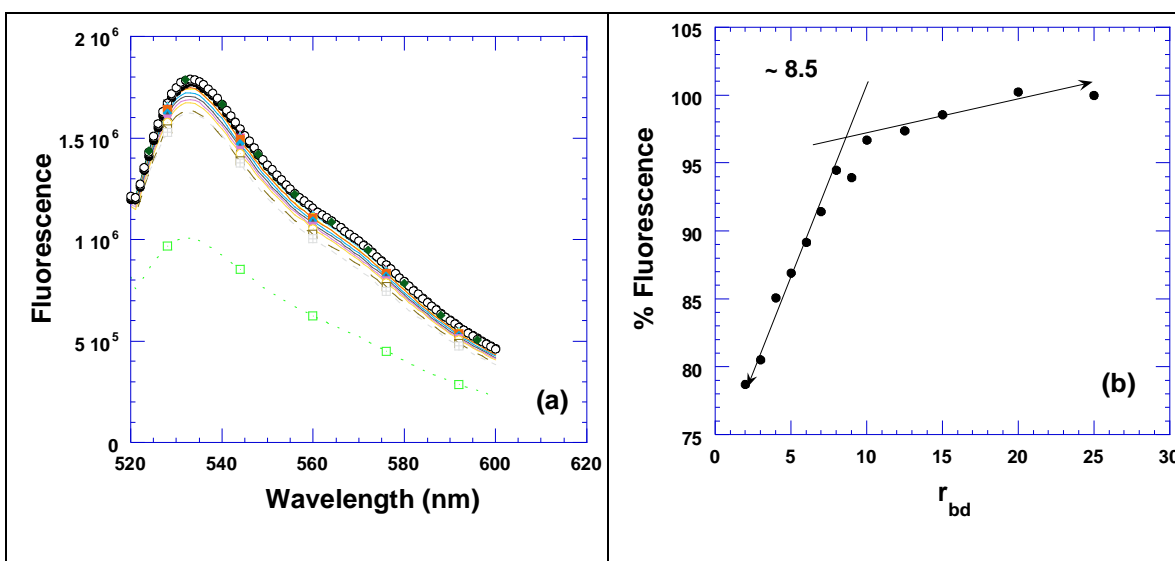



**Figure S41.** (a) Fluorescence titration of neomycin into poly(dA-dT)<sub>2</sub> (15 μM/base pair). (b) A plot of fluorescence intensity *versus* corresponding  $r_{bd}$  values. The cross of two apparent linear portions reveals  $r_{bd} \sim 8.5$ . Experiment was carried out in buffer 10 mM sodium cacodylate, 0.5 mM EDTA, 100 mM NaCl at pH 6.8.

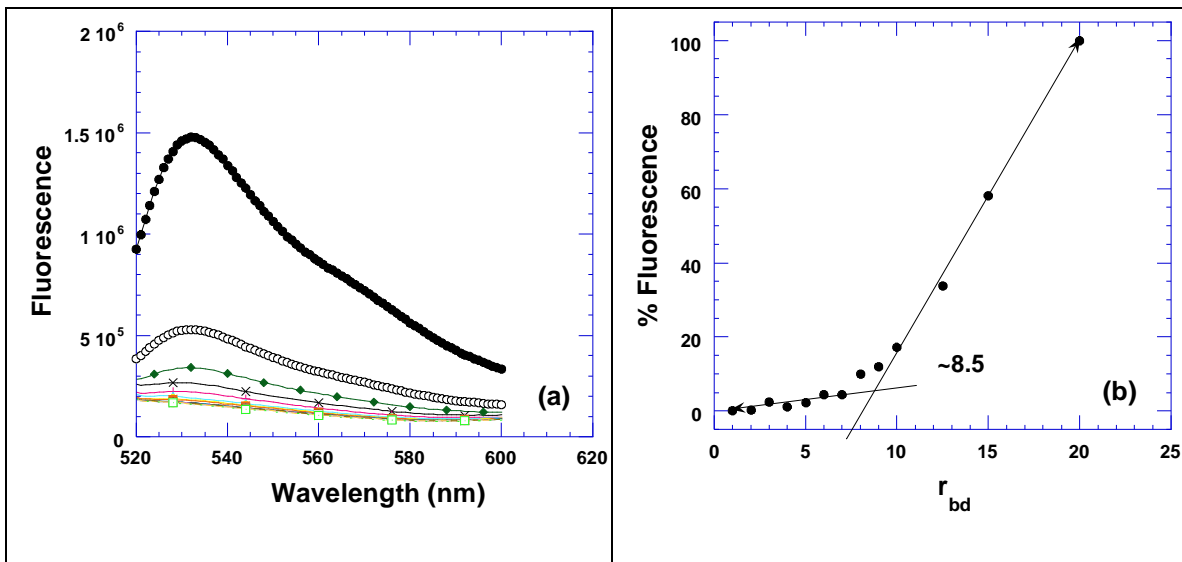

**Figure S42.** (a) Fluorescence titration of neomycin into poly(rA).poly(rU) (15 μM/base pair). (b) A plot of fluorescence intensity *versus* corresponding  $r_{bd}$  values. The cross of two apparent linear portions reveals  $r_{bd} \sim 8.5$ . Experiment was carried out in buffer 10 mM sodium cacodylate, 0.5 mM EDTA, 100 mM NaCl at pH 6.8.

**Table S1.** Computer generated models for neomycin bound to various nucleic acids as suggested by docking studies using Autodock Vina 1.0.

|                                                                                     |                                                                                     |                                                                                     |                                                                                       |                                                                                       |
|-------------------------------------------------------------------------------------|-------------------------------------------------------------------------------------|-------------------------------------------------------------------------------------|---------------------------------------------------------------------------------------|---------------------------------------------------------------------------------------|
| 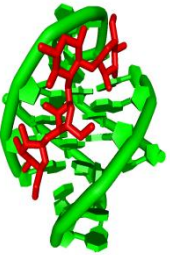   |    |    |    |    |
| 156D·neomycin                                                                       | 1BNA·neomycin                                                                       | 1D3R·neomycin                                                                       | 440D·neomycin                                                                         | 406D·neomycin                                                                         |
|    |   |    |   |   |
| 1DC0·neomycin                                                                       | 1ZEX·neomycin                                                                       | 1ZEY·neomycin                                                                       | 1ZF1·neomycin                                                                         | 1ZF6·neomycin                                                                         |
|  |  |  |  |  |
| 1ZF8·neomycin                                                                       | 1ZF9·neomycin                                                                       | 1ZFA·neomycin                                                                       | 1ZFJ·neomycin                                                                         | 2ANA·neomycin                                                                         |
|  |  |  |                                                                                       |                                                                                       |
| 2ETA4·neomycin                                                                      | 3ZNA·neomycin                                                                       | 143D·neomycin                                                                       |                                                                                       |                                                                                       |

**Table S2.** Computer generated data for neomycin bound to various nucleic acids as a as determined according to structure. Results report binding affinity as a function of groove width. PDB identification correlates with models represented in Table S1.

| Nucleic Acid                   | Sequence                                 | PDB ID   | Length (mer) | Groove Width (Å) | Binding Affinity (kcal/mol) |
|--------------------------------|------------------------------------------|----------|--------------|------------------|-----------------------------|
| A-Form Duplex                  | d-5'(AGGGGCGGGGCT)<br>d-5'(TAGCCCCGCCCC) | 1ZJF     | 12           | 9.0              | -9.8                        |
| RNA A-Form                     | R(CACCGGAUGGU(5BU)CGGU<br>G)             | 406D     | 13           | 9.3              | -10                         |
| Synthetic Z Form DNA           | d-5'(CGCGCGCGCGCG)                       | 3ZNA     | 12           | 13.3             | -7.8                        |
| Quadplex <i>Oxytricha Nova</i> | d-5'(GGGGTTTTGGGG)                       | 156D     | 12           | 14.3             | -7.2                        |
| B-Form Duplex (Major Groove)   | d-5'(CGCGAATTCGCG)                       | 1BN<br>A | 12           | 16.5             | -7.3                        |
| Quadruplex Human               | d-<br>5'(AGGGTTAGGGTTAGGGTT<br>AGGG)     | 143D     | 22           | 15.8             | -7.1                        |

**Table S3.** A-form nucleic acid structures bound to neomycin and modeled according to content and length. Results report binding affinity as a function of groove width. PDB identification correlates with models represented in Table S1.

| DNA Type   | Sequence                                 | PDB ID   | Length (mer) | Groove Width (Å) | Binding Affinity (kcal/mol) |
|------------|------------------------------------------|----------|--------------|------------------|-----------------------------|
| A-form DNA | d-5'(AGGGGCGGGGCT)<br>d-5'(TAGCCCCGCCCC) | 1ZJF     | 12           | 8.5              | -9.8                        |
| A-form DNA | d-5'(CCCCATGGGG)                         | 1ZF6     | 10           | 6.9              | -9.4                        |
| A-form DNA | d-5'(CATGGGCCCATG)                       | 1DC0     | 12           | 14.3             | -8.8                        |
| A-form DNA | d-5'(AGGGGCCCT)                          | 440D     | 10           | 10.0             | -8.7                        |
| A-form DNA | d-5'(CCCGGCCGGG)                         | 1ZEX     | 10           | 8.2              | -8.7                        |
| A-form DNA | d-5'(CCCCGCGGGG)                         | 1ZEY     | 10           | 8.5              | -8.7                        |
| A-form DNA | d-5'(CCCCCGGGGG)                         | 1ZF9     | 10           | 8.8              | -8.6                        |
| A-form DNA | d-5'(CCGGGCCCGG)                         | 1ZF1     | 10           | 9.2              | -8.4                        |
| A-form DNA | d-5'(CCTCCGGAGG)                         | 1ZFA     | 10           | 8.8              | -8.3                        |
| A-form DNA | d-5'(CCACCGGTGG)                         | 1ZF8     | 10           | 10.7             | -8.2                        |
| A-form DNA | d-5'(GGGGCCCC)                           | 2AN<br>A | 8            | 12.5             | -8.1                        |

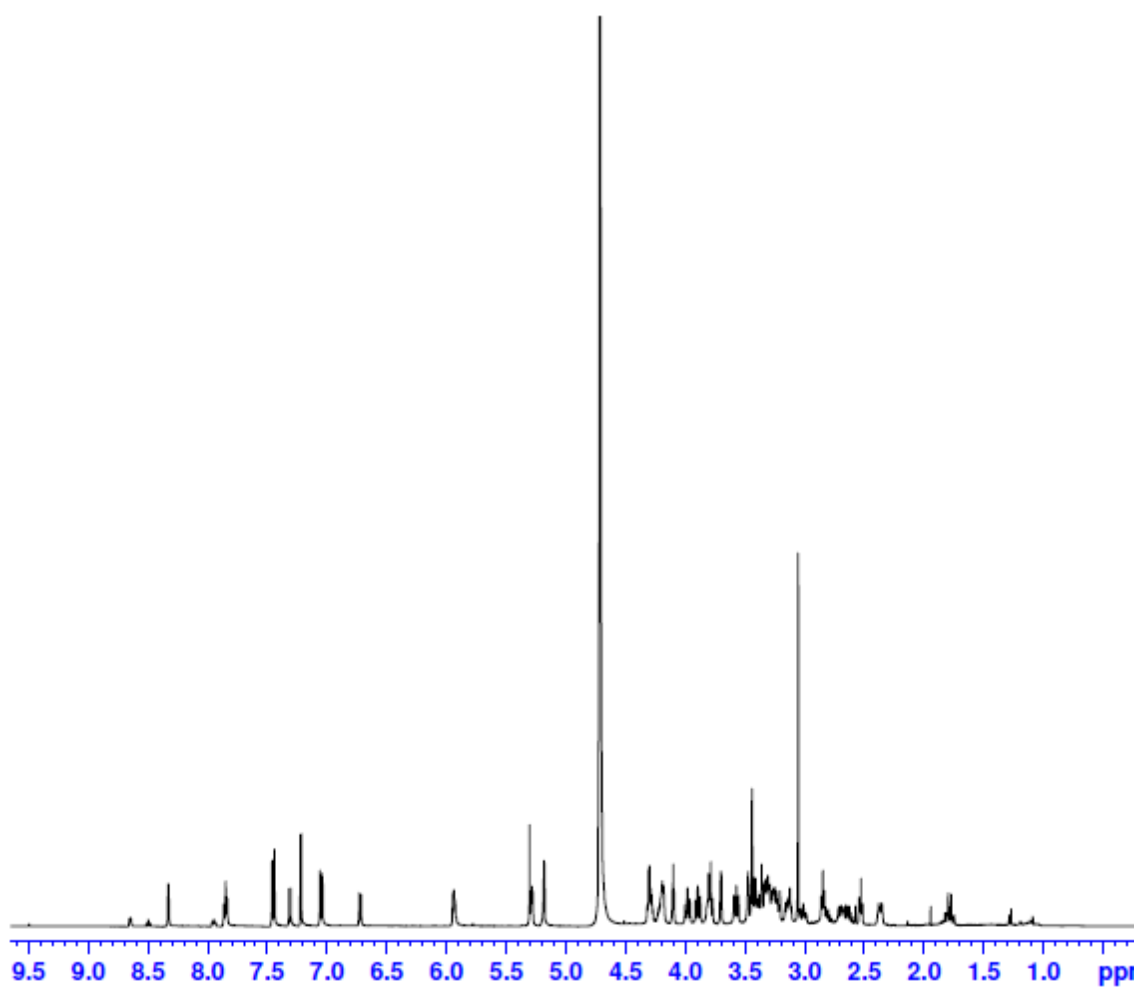

**Figure S43.**  $^1\text{H}$  NMR of fluorescein-neomycin (**F-neo**) conjugate **4**.

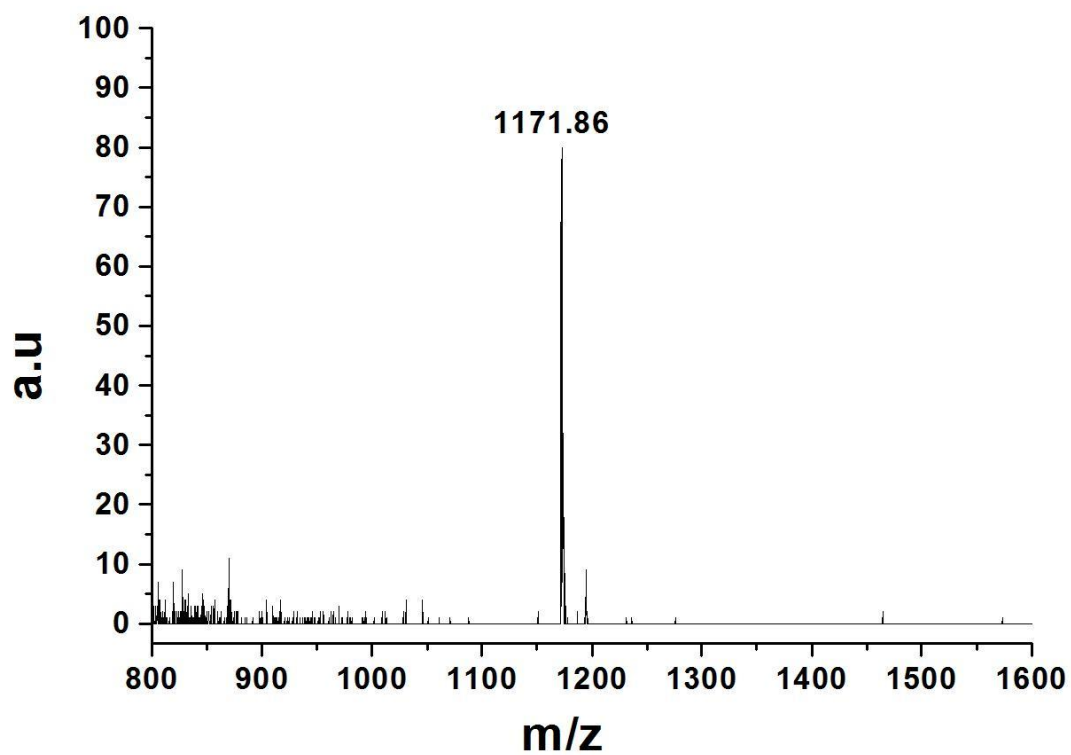

**Figure S44.** MALDI-TOF spectra of fluorescein-neomycin (**F-neo**) conjugate **4**.
